# Supplementary material for: 1,3-Benzodioxole Derivatives Improve the Anti-Tumor Efficiency of Arsenicals
Source: MDPI journal article supplement (doi:10.3390/ijms23136930), 2022-06-22
Supplement: s1 [file s1]

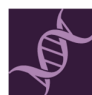

Article: Supporting Information

# 1,3-Benzodioxole Derivatives Improve the Anti-Tumor Efficiency of Arsenicals

Xue-Min Shi <sup>1</sup>, Wen-Yan She <sup>1</sup>, Ting-Ting Liu <sup>2</sup>, Lian-Xun Gao <sup>1</sup>, Yu-Jiao Liu <sup>2,\*</sup> and Yi Liu <sup>1,2,\*</sup>

<sup>1</sup> College of Chemistry and Molecular Science, Wuhan University, Wuhan 430072, China; xueminshichem@whu.edu.cn (X.-M.S.); wenyanshe@whu.edu.cn (W.-Y.S.); lxgaochem@whu.edu.cn (L.-X.G.)

<sup>2</sup> State Key Laboratory of Separation Membranes and Membrane Processes, School of Chemistry, Tiangong University, Tianjin 300387, China; 2120020069@tiangong.edu.cn

\* Correspondence: yujiaoliu@tiangong.edu.cn or yujiaoliu@whu.edu.cn (Y.-J.L.); yiliuchem@whu.edu.cn (Y.L.); Tel.: +86-27-68753465 (Y.L.); Fax.: +86-27-68754067 (Y.L.)

## contents

|                                                                             |    |
|-----------------------------------------------------------------------------|----|
| Characterization of chemical structure .....                                | 2  |
| MTT assay of arsenicals to 5 cell lines.....                                | 27 |
| MAZ2 inhibited TrxR activity by binding to the C-terminal Sec/Cys pair .... | 28 |
| MAZ2 administration had no obvious side effects.....                        | 31 |
| siRNA .....                                                                 | 31 |
| PCR.....                                                                    | 31 |

## Characterization of chemical structure

Z2

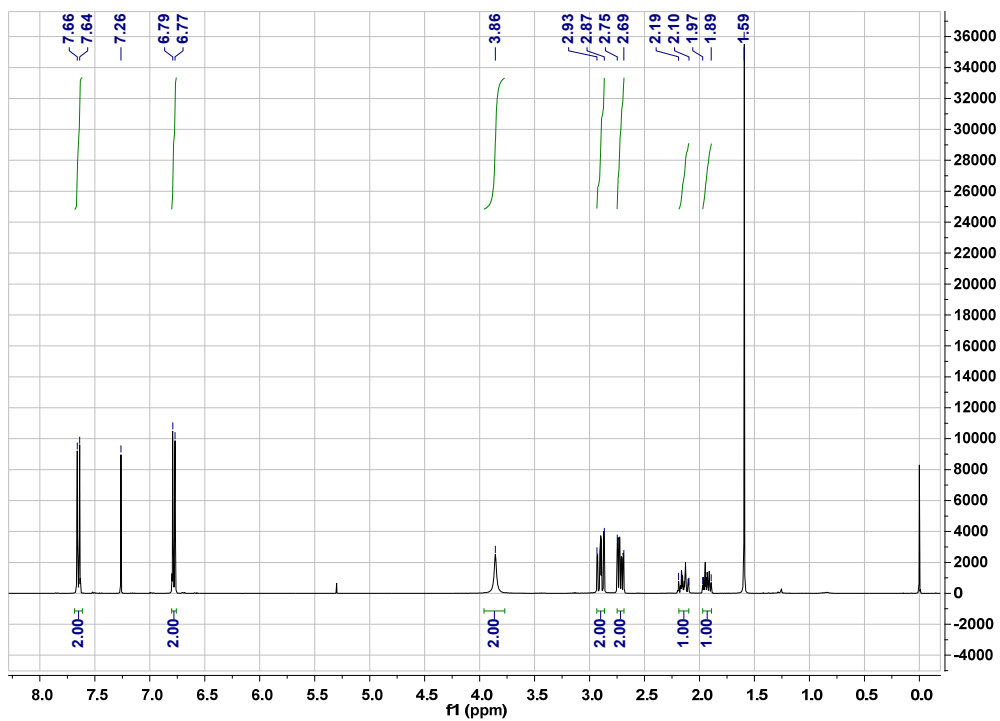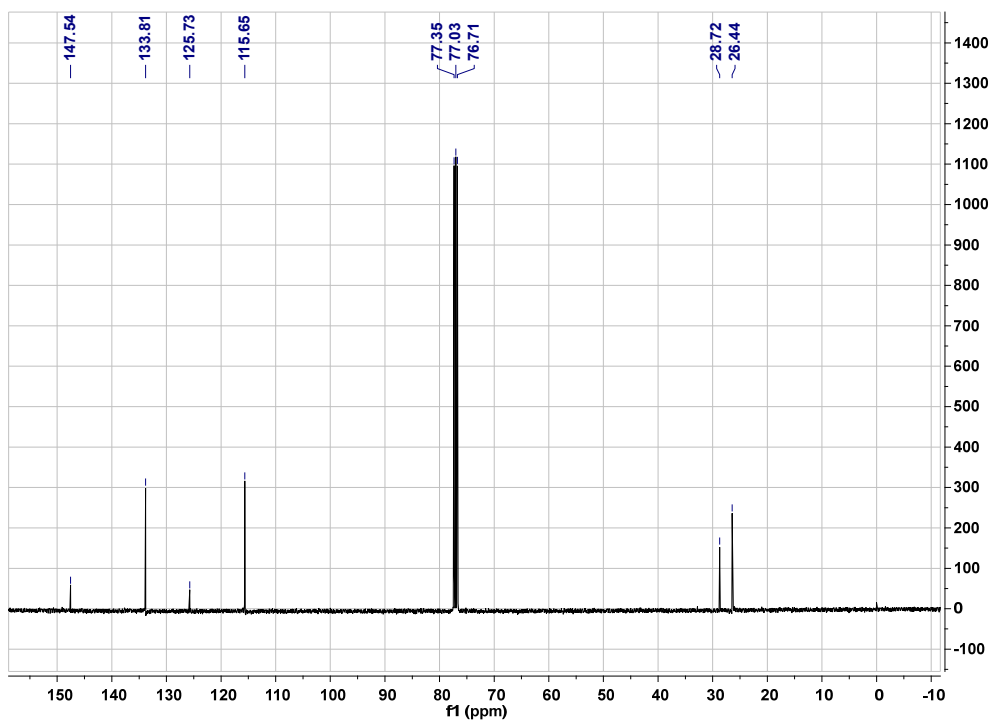

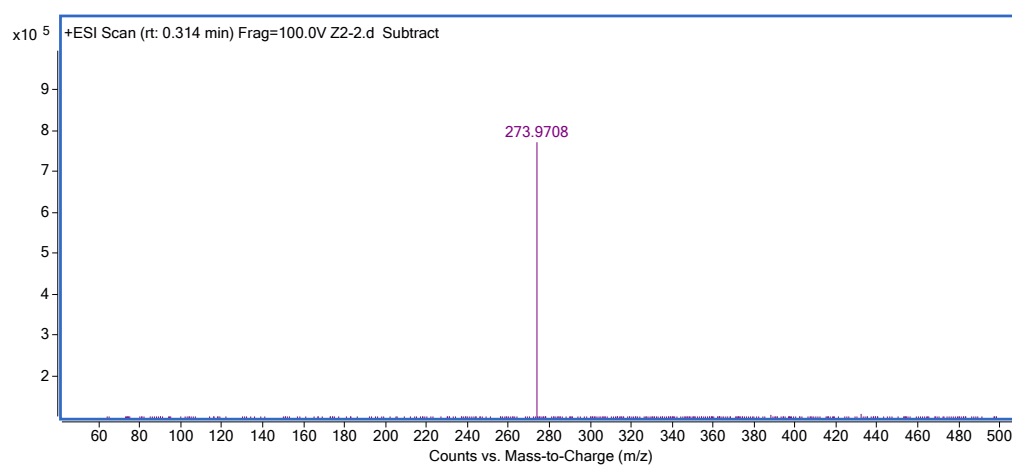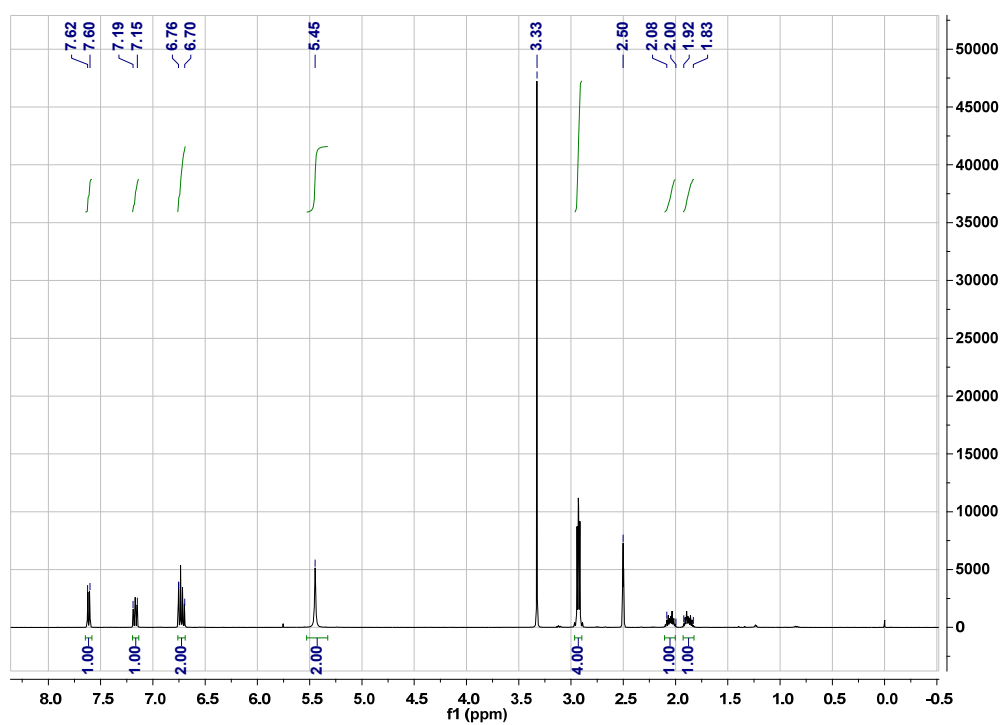

Z5

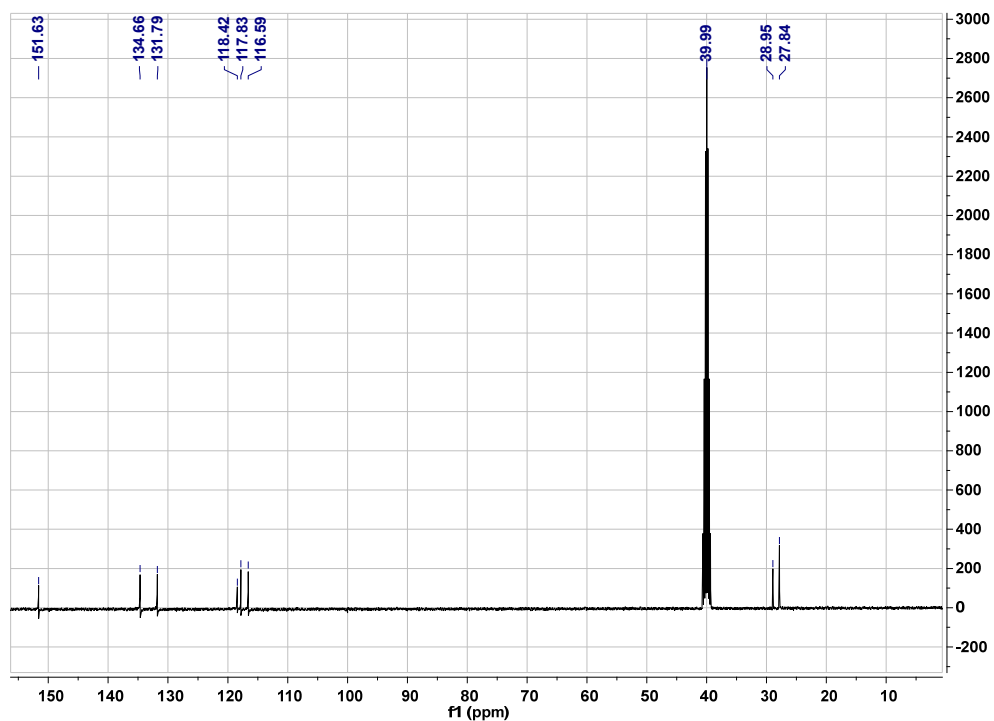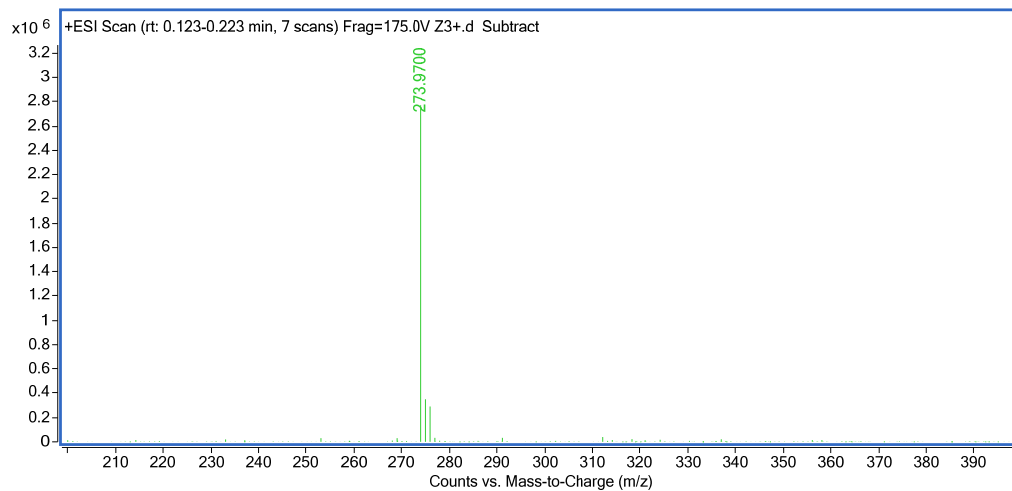

PZ2

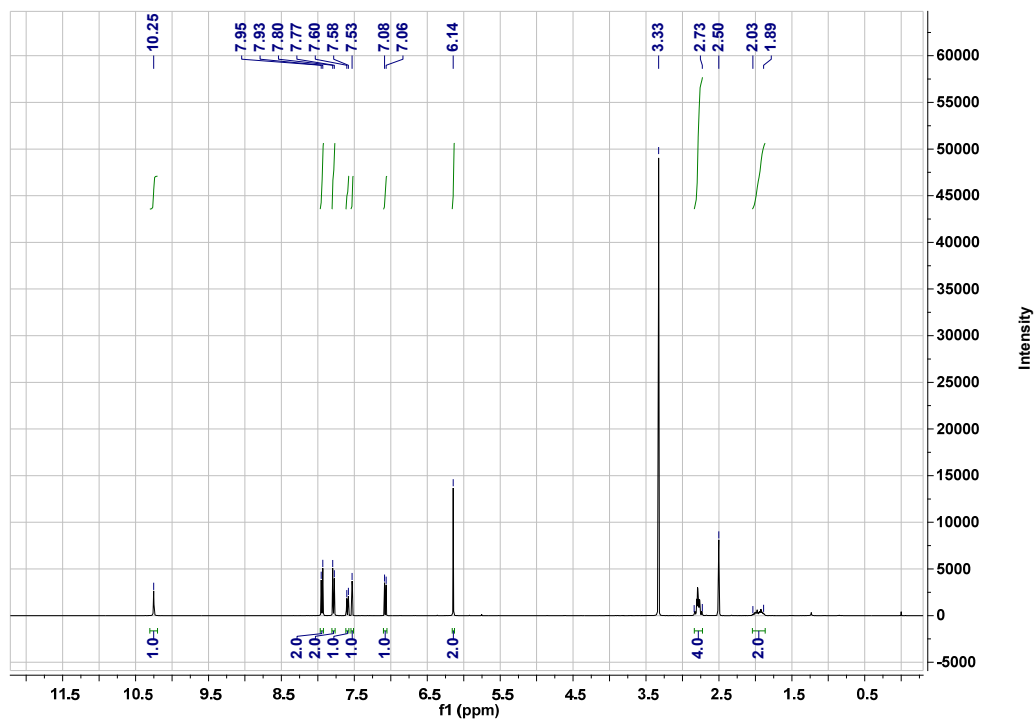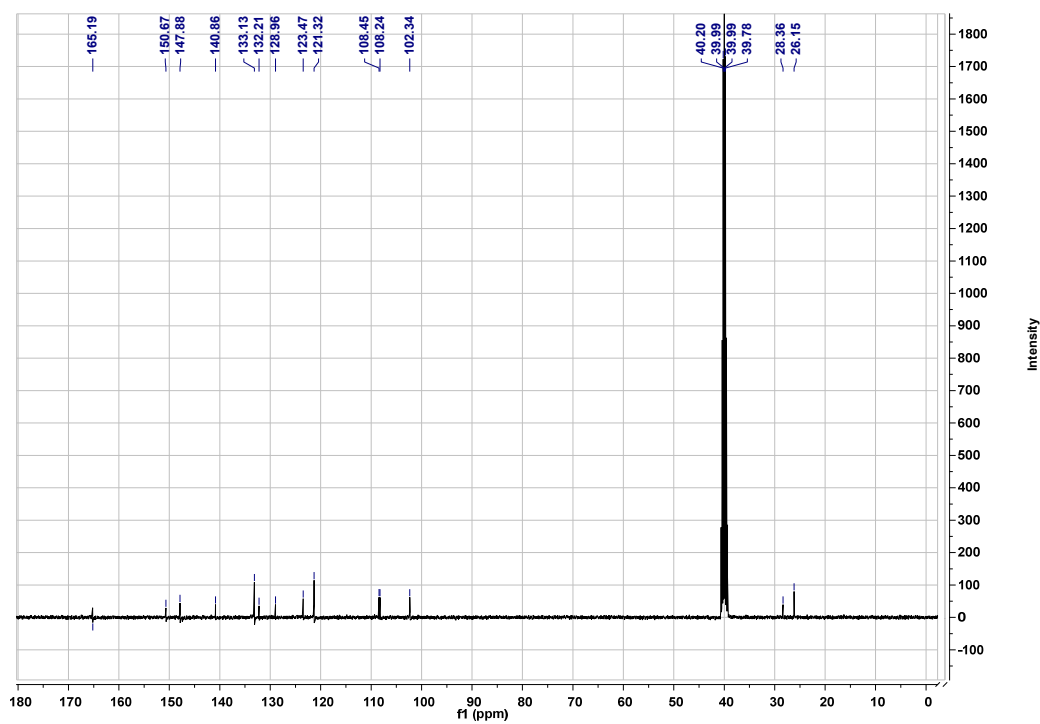

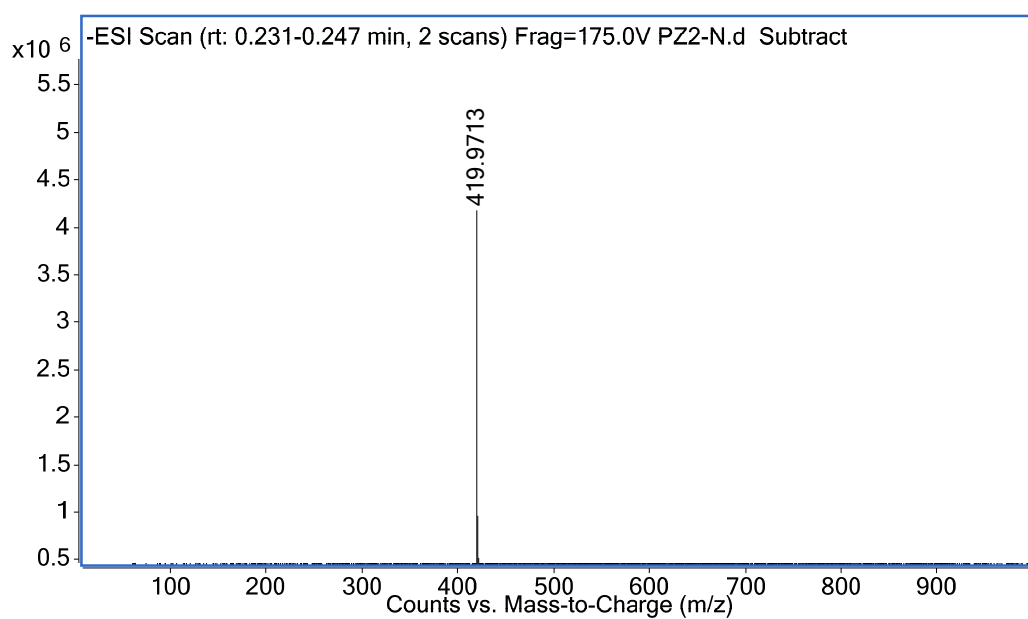

PZ5

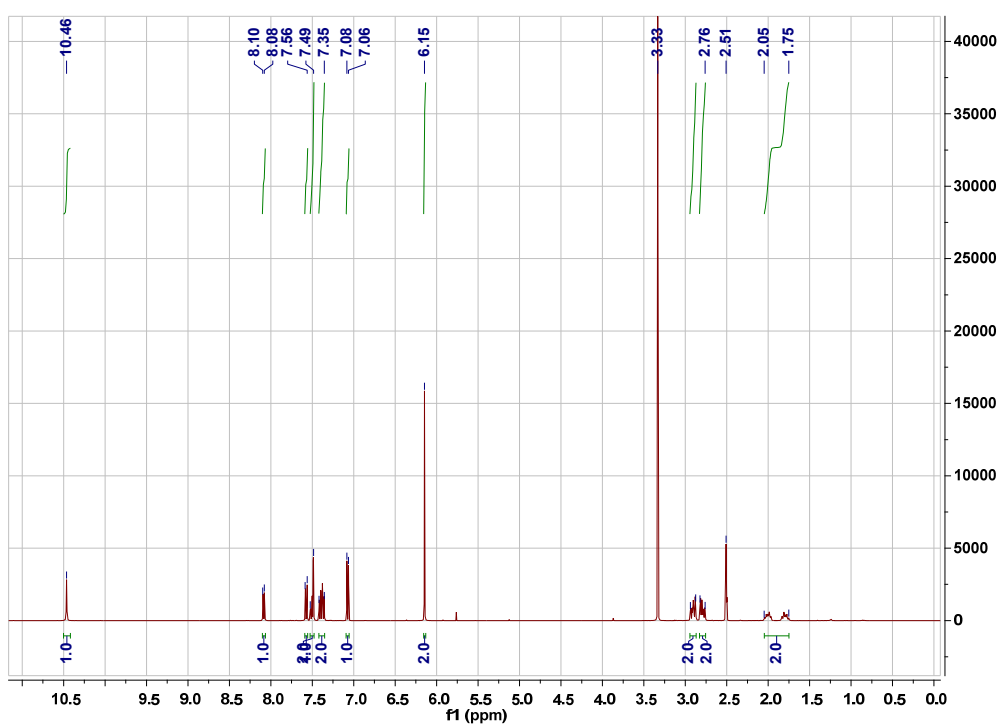

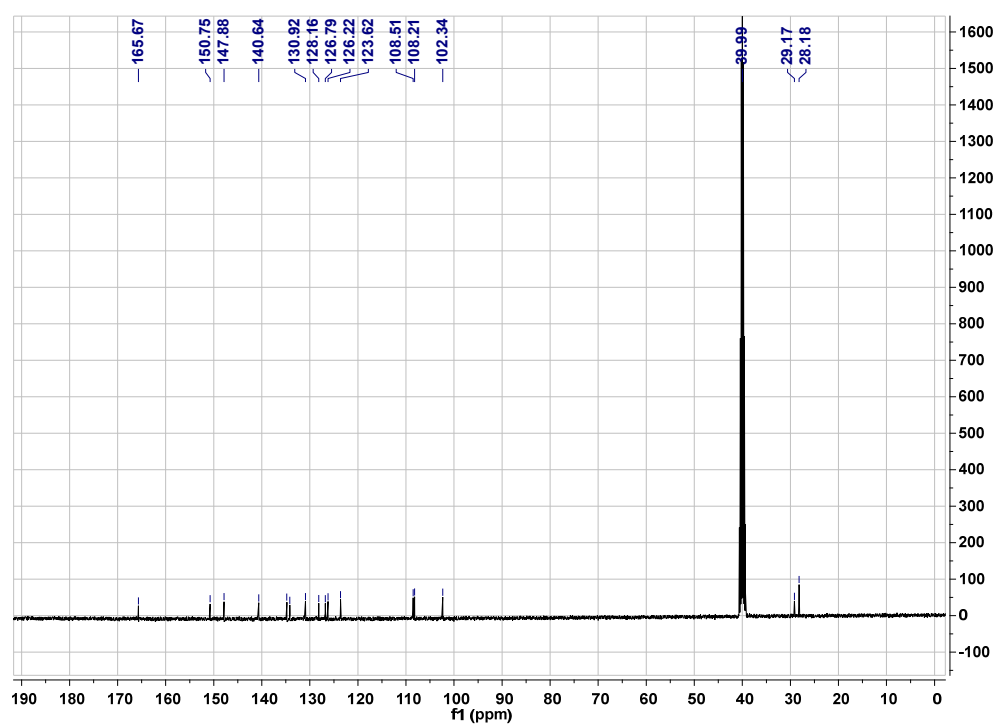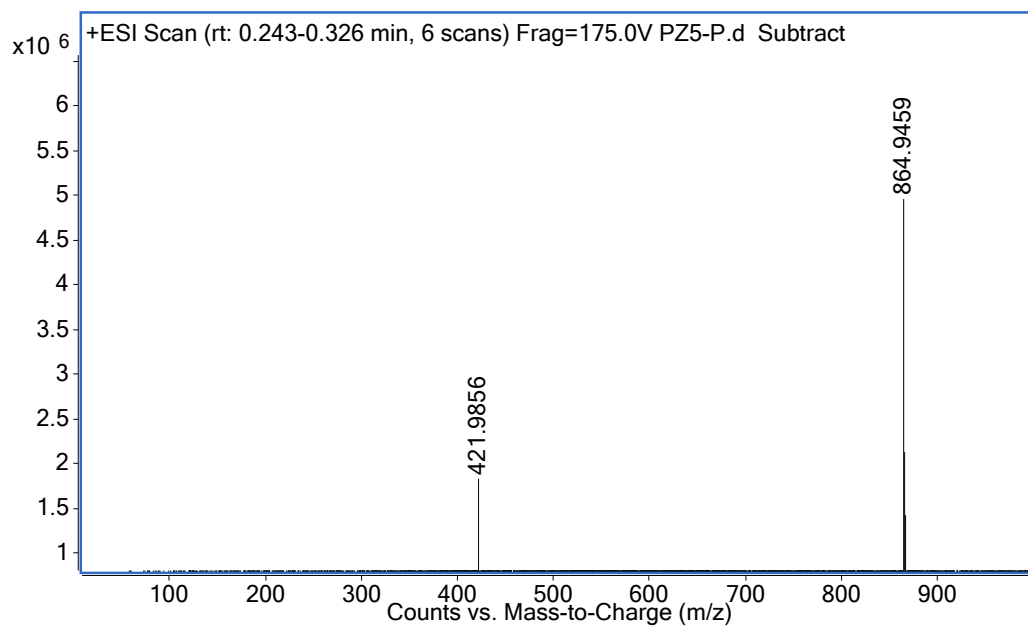

## PFZ2

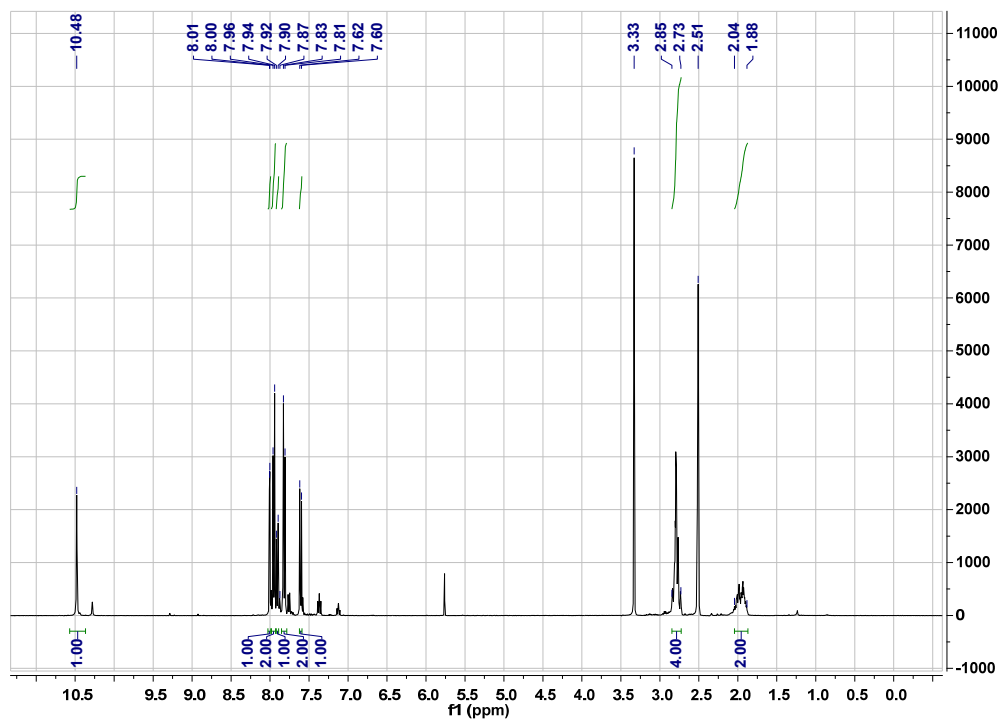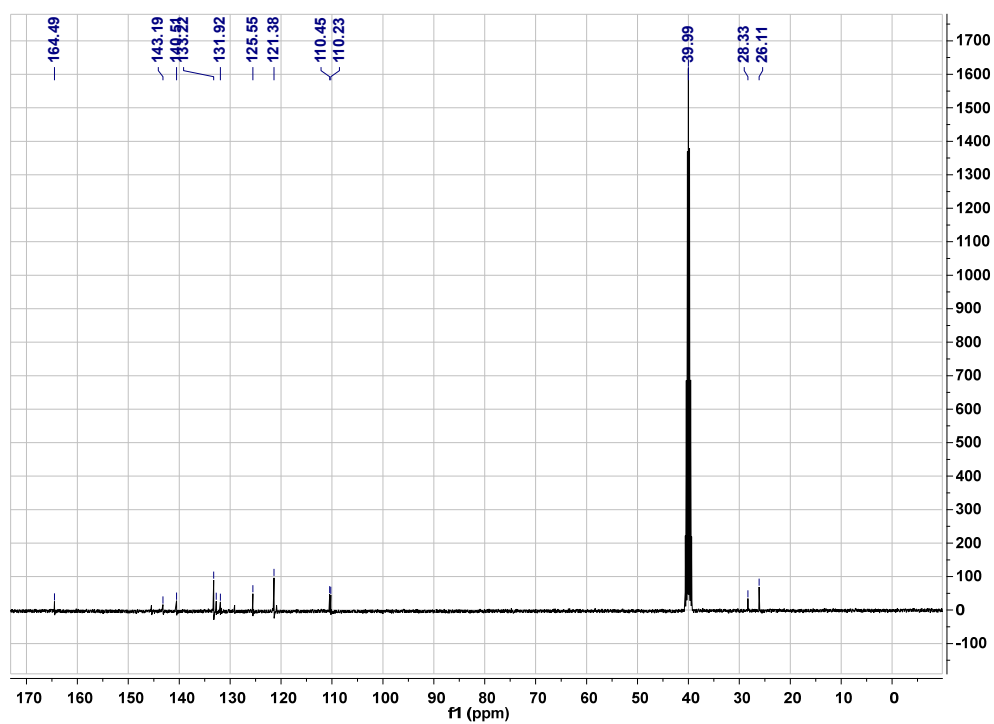



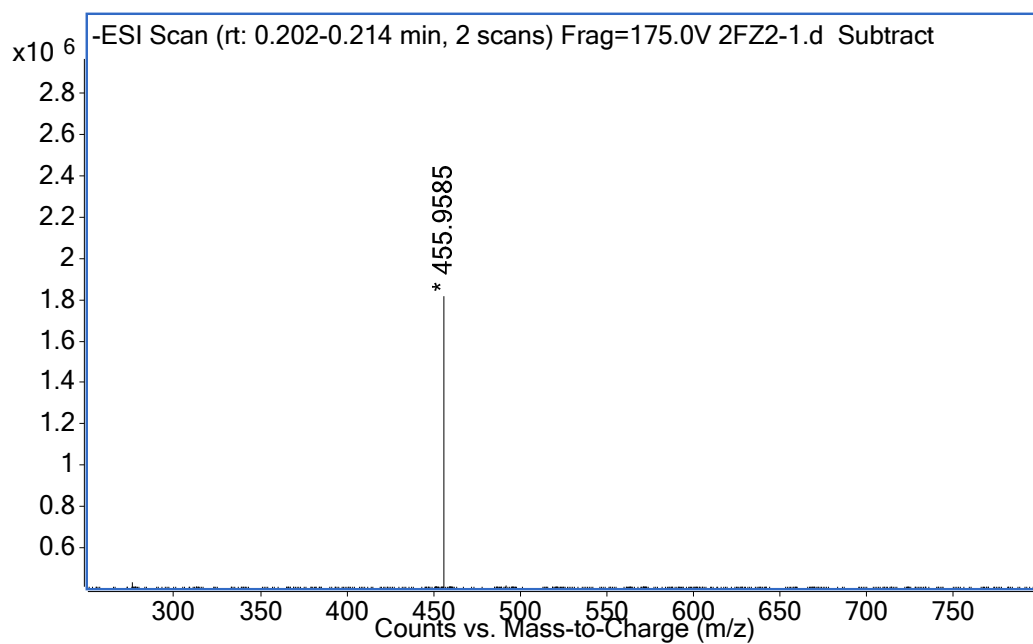

HDZ2

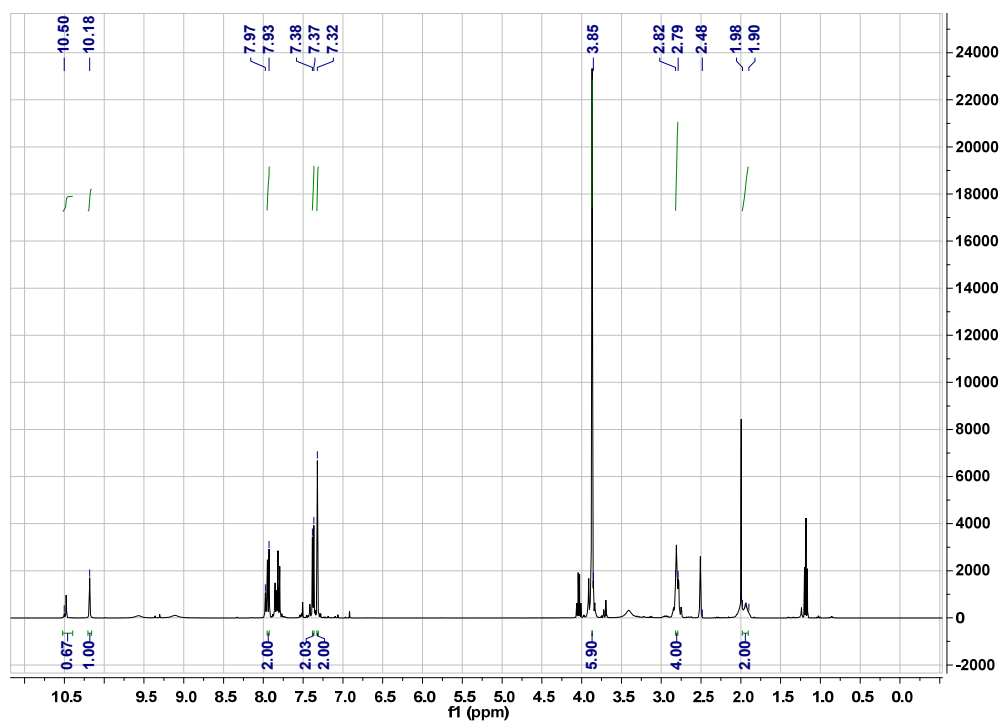

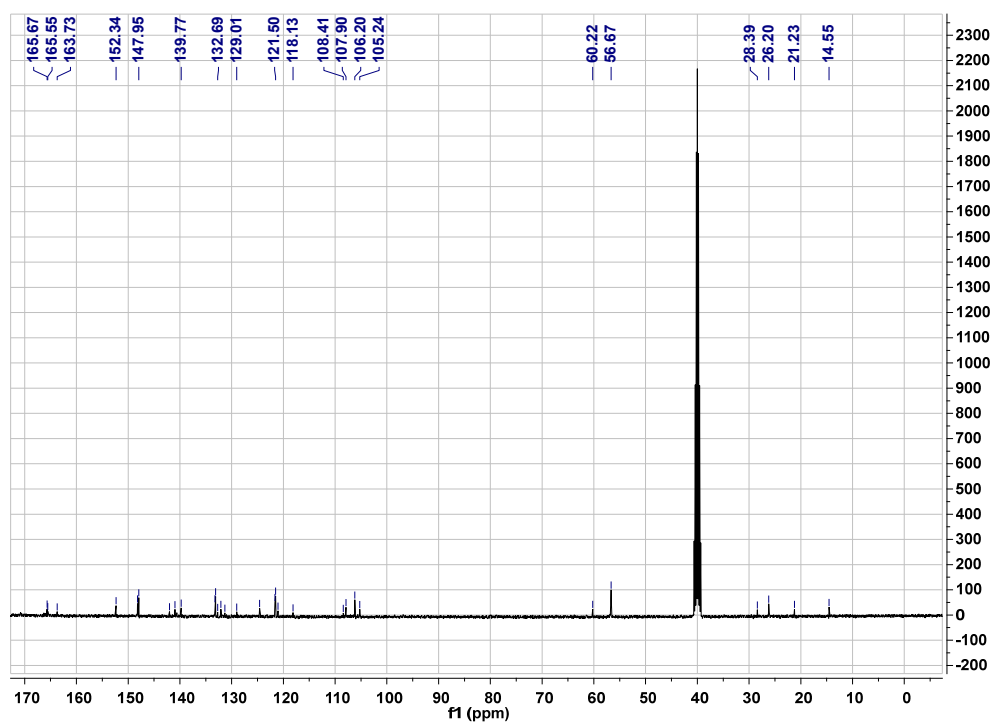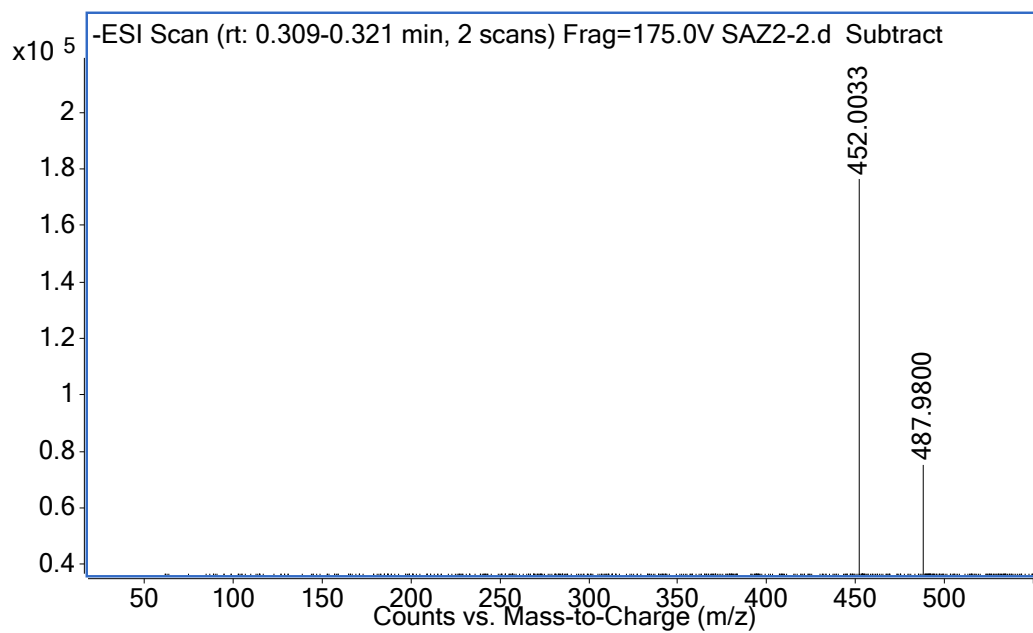

TAZ2

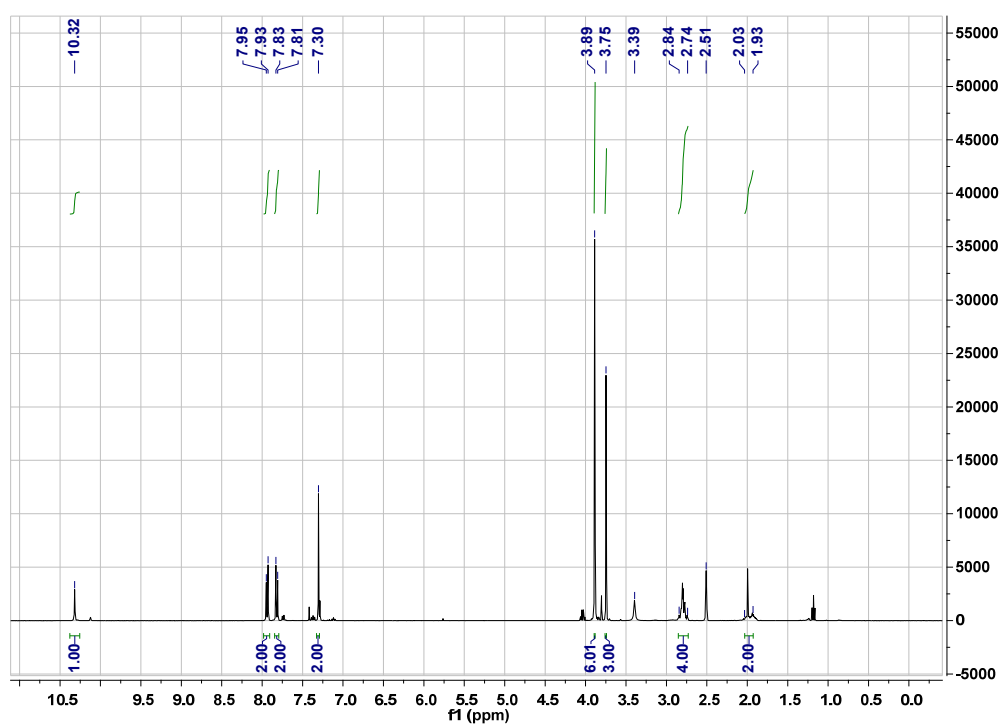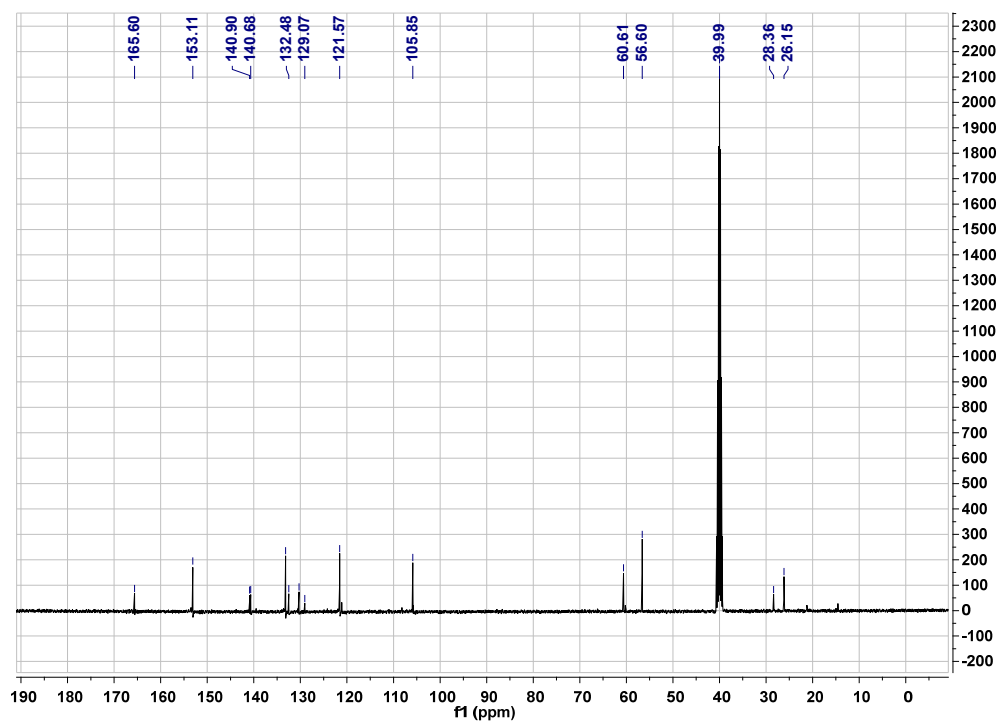

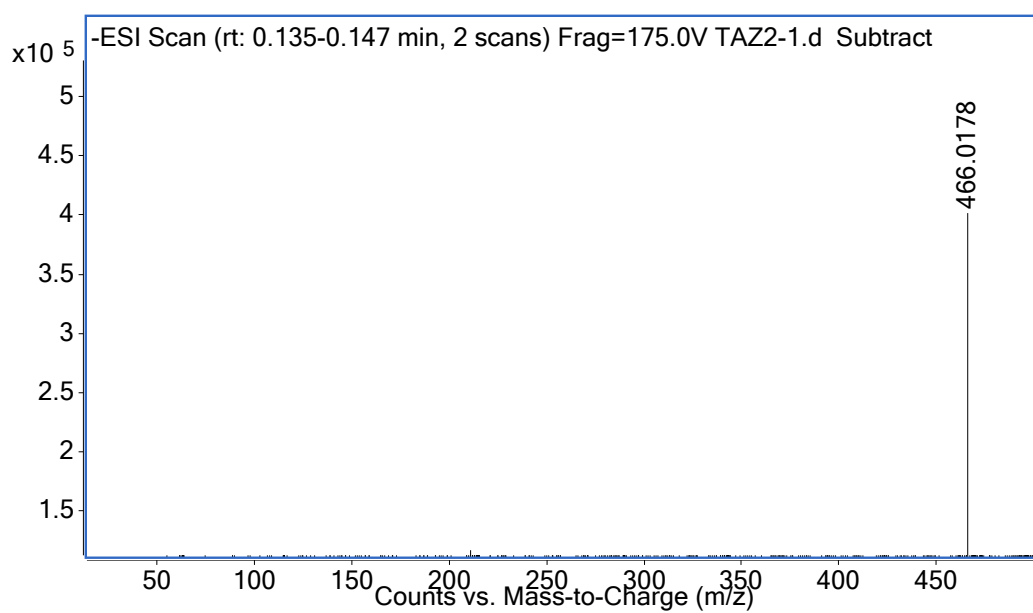

TAZ5

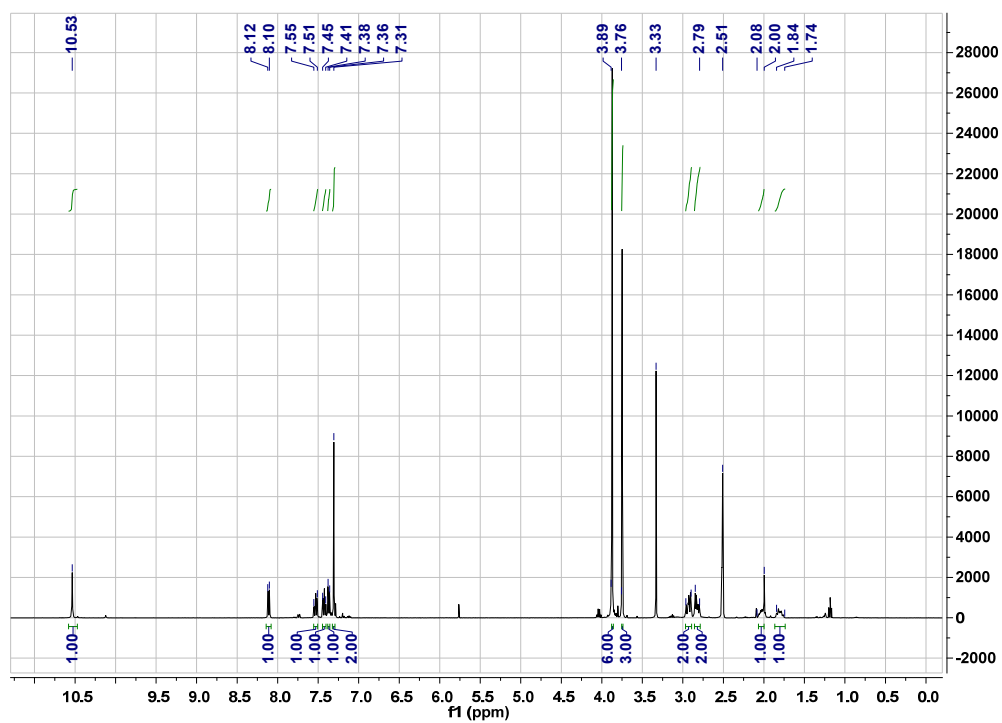

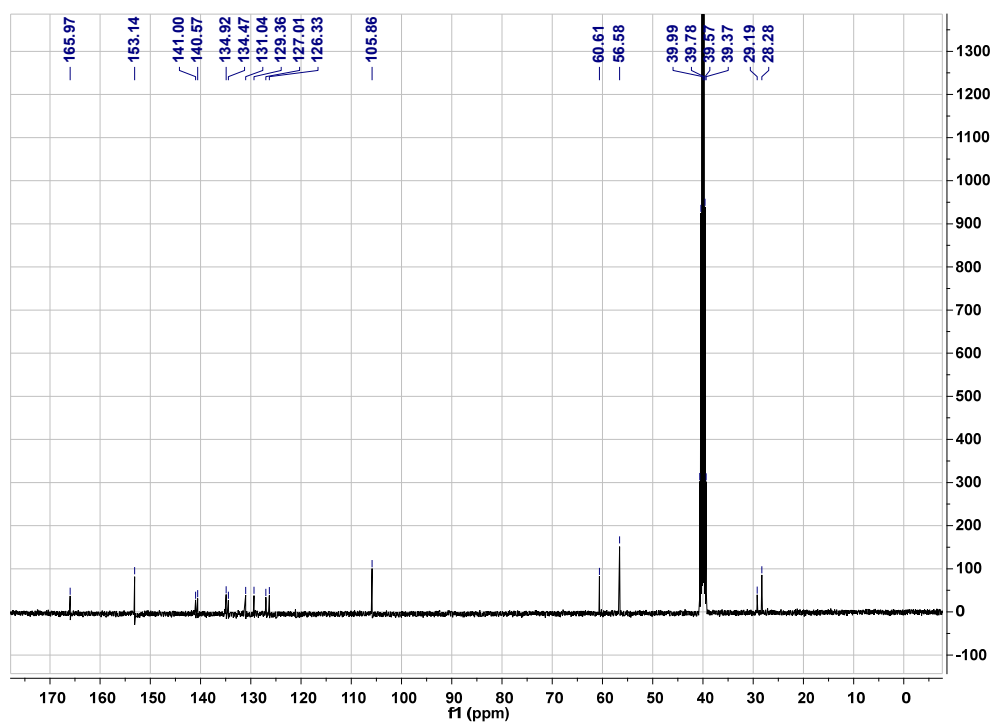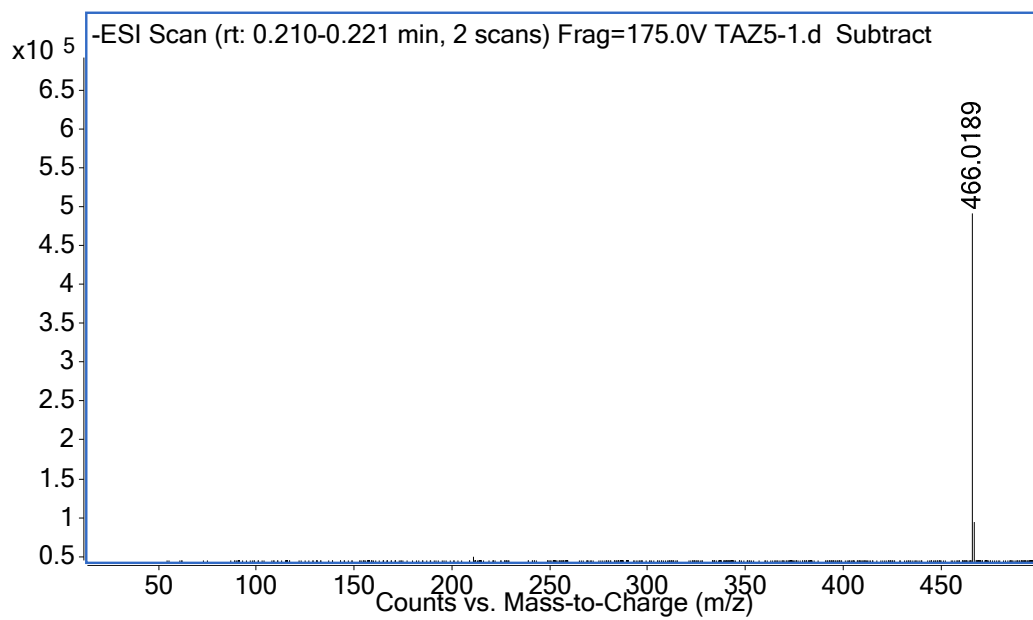

DAZ2

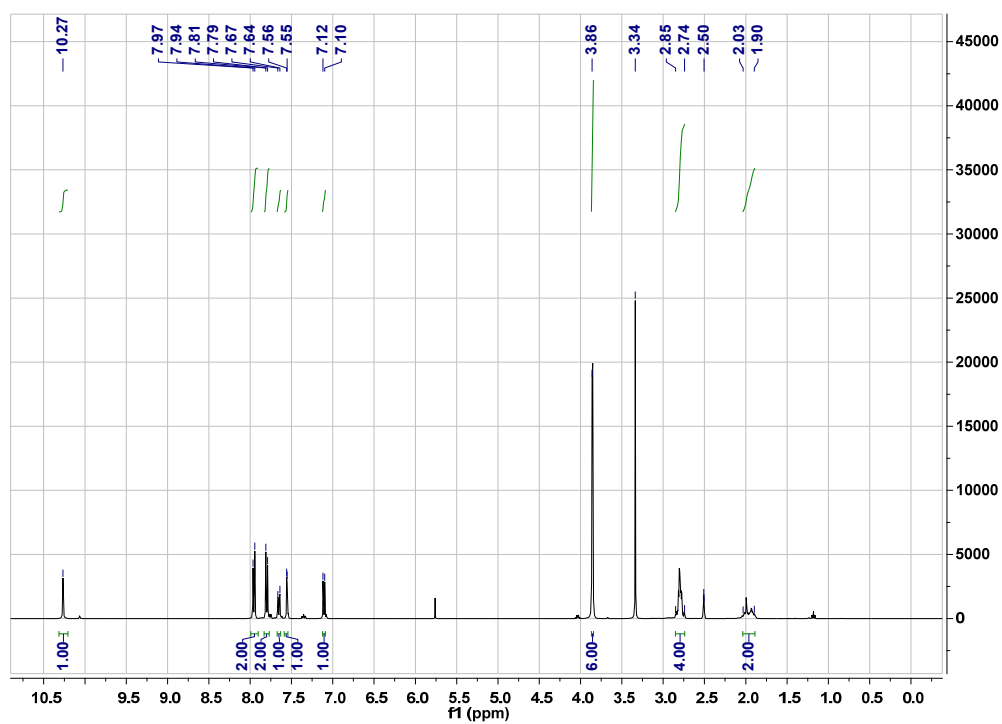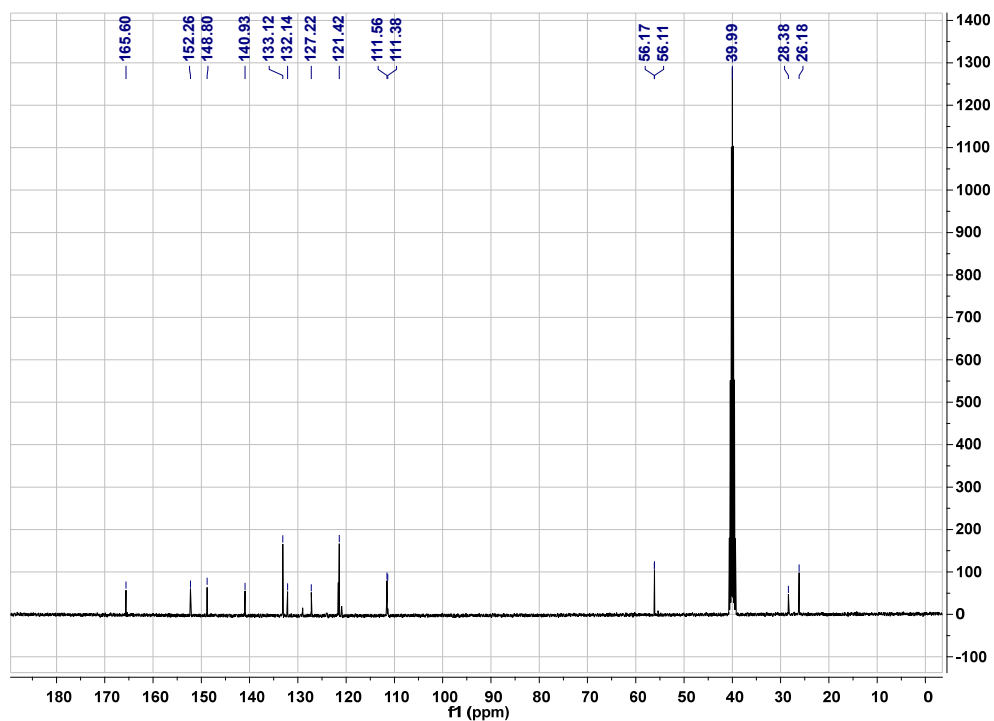

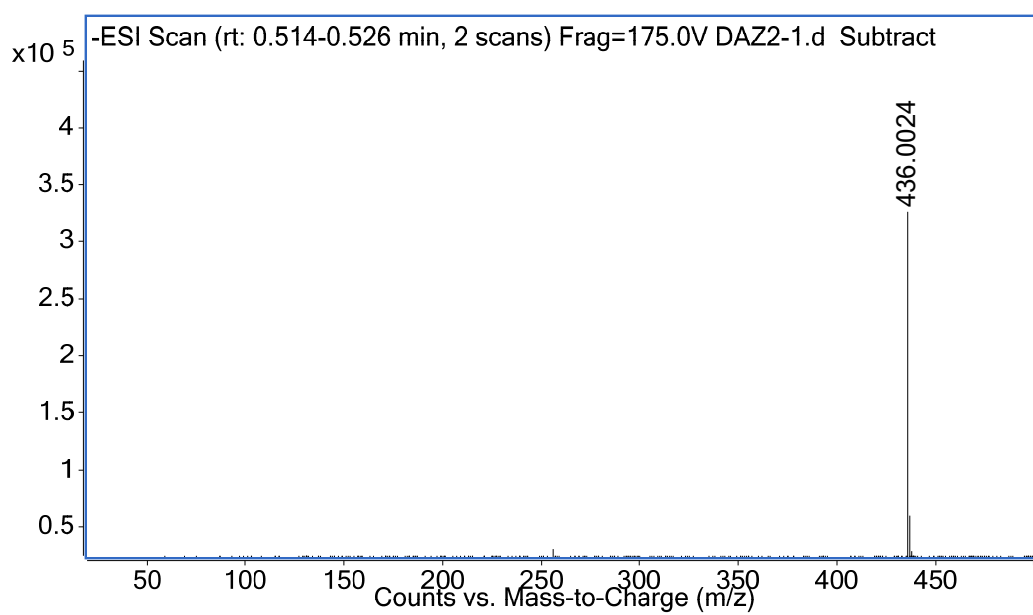

DAZ5

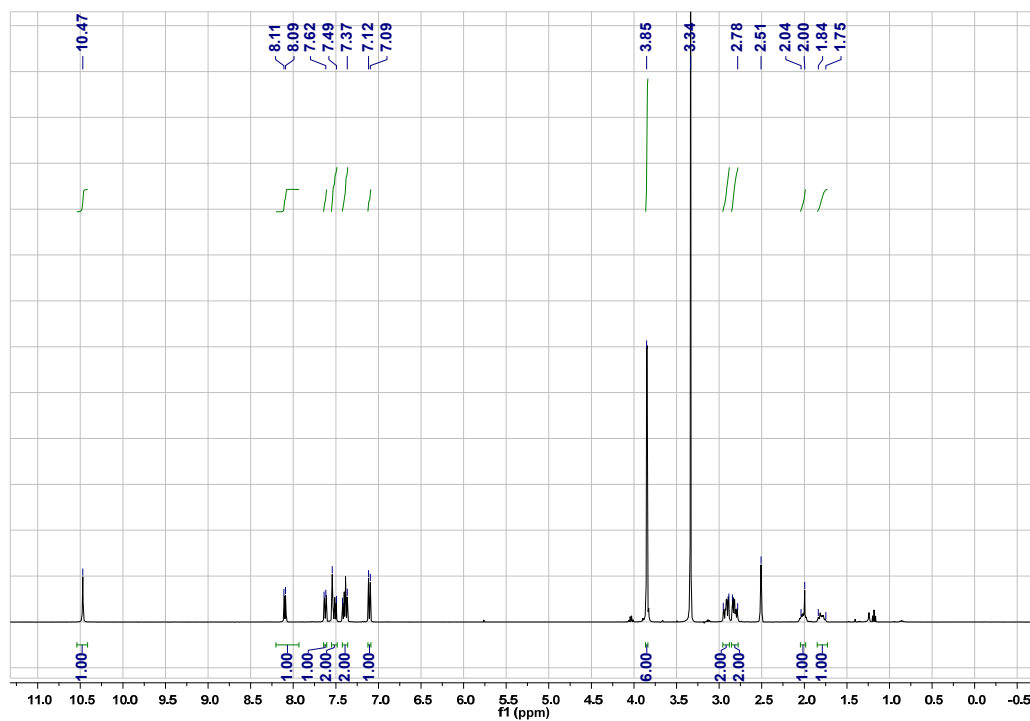

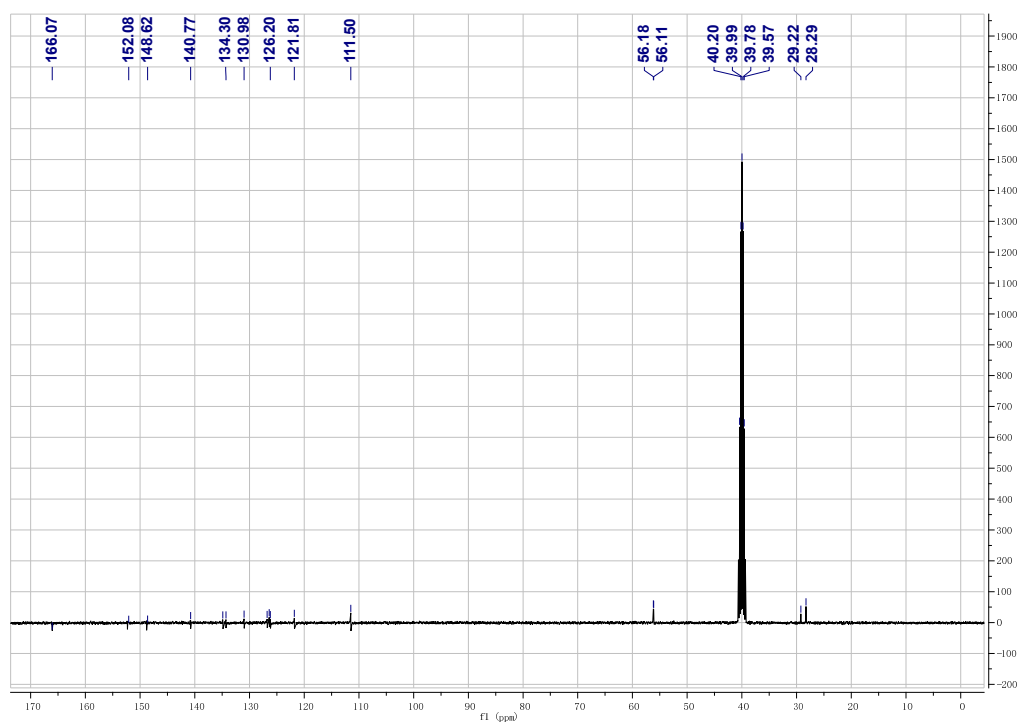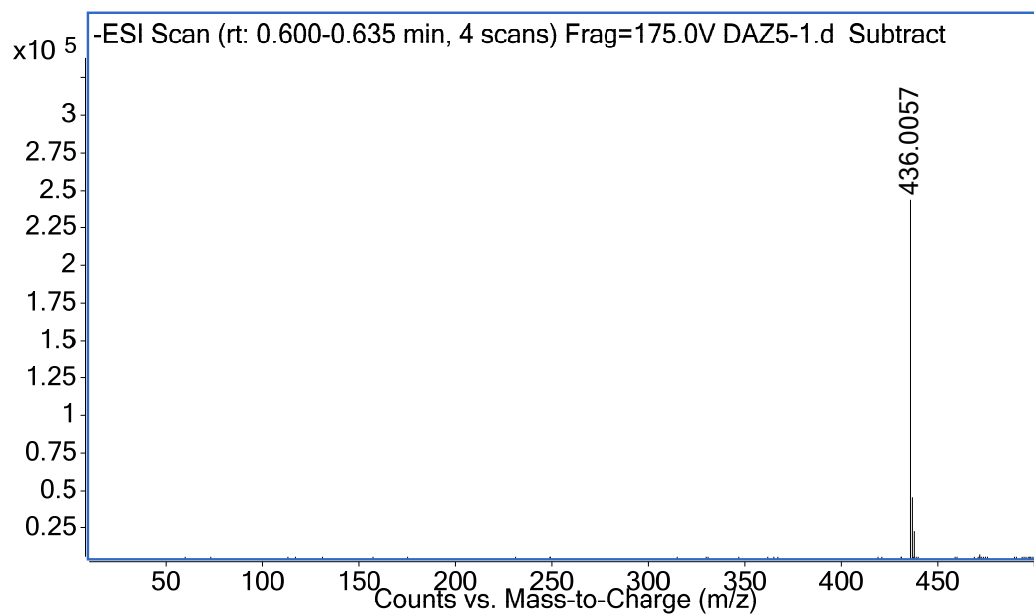



## MAZ2

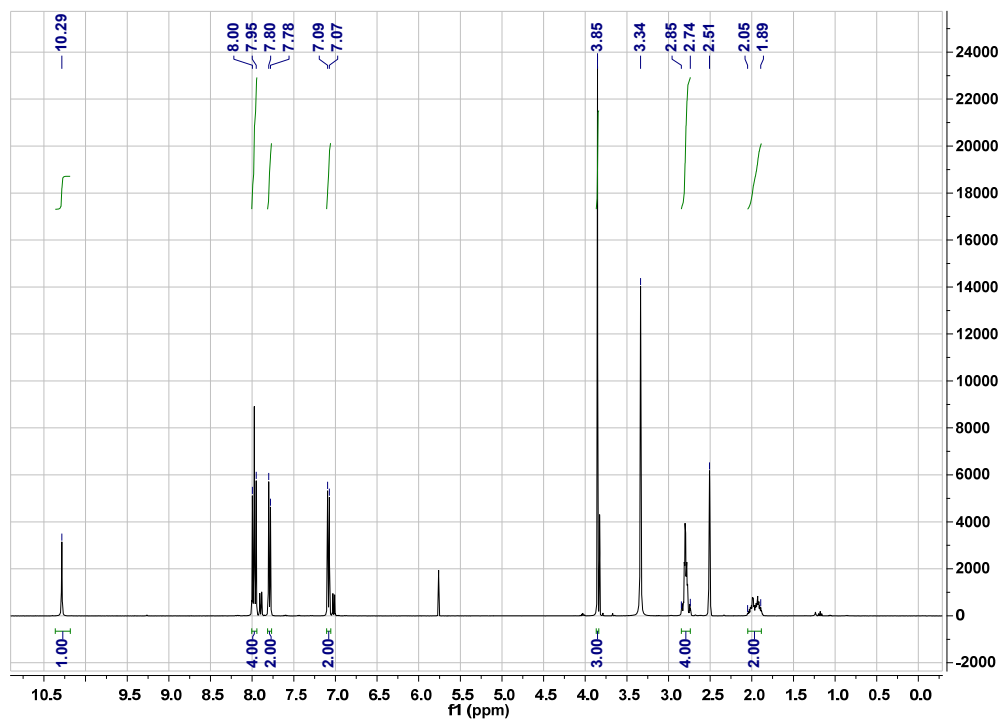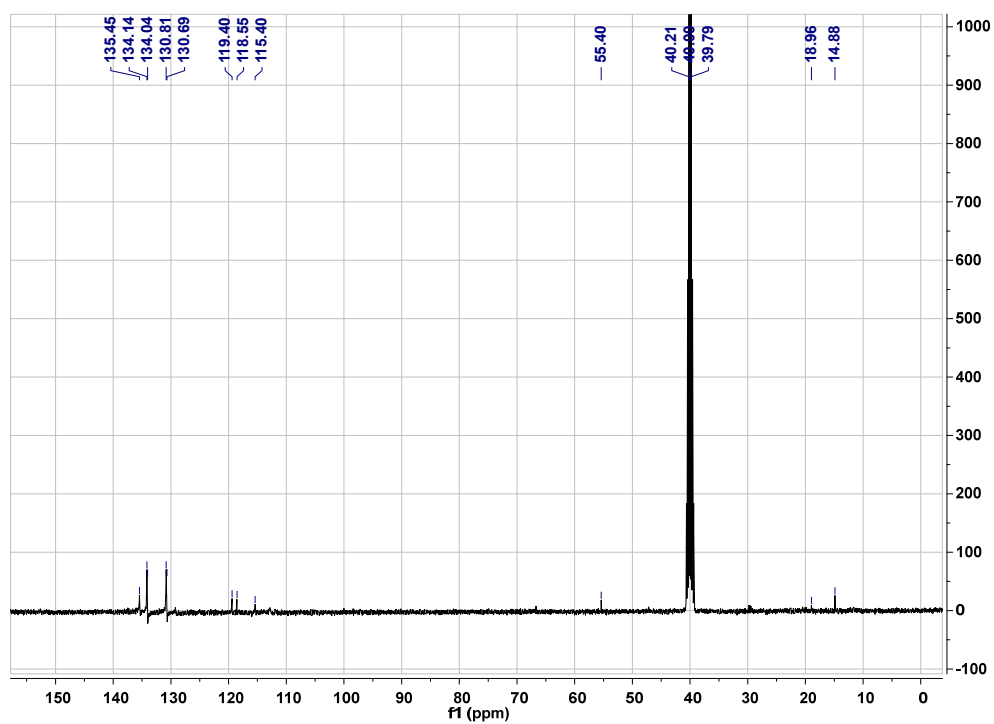

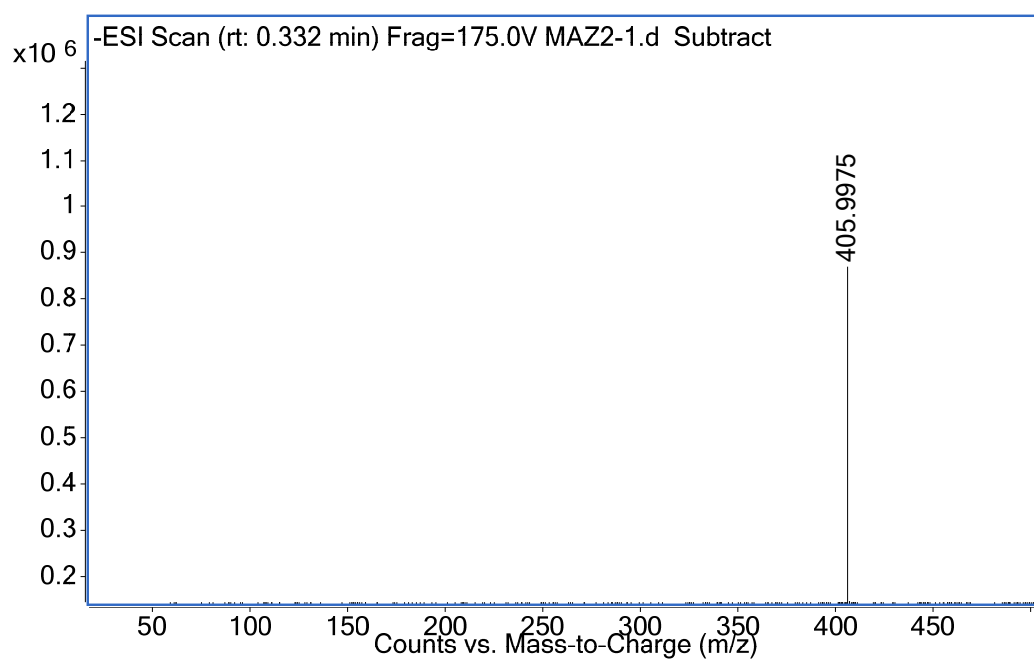

FZ2

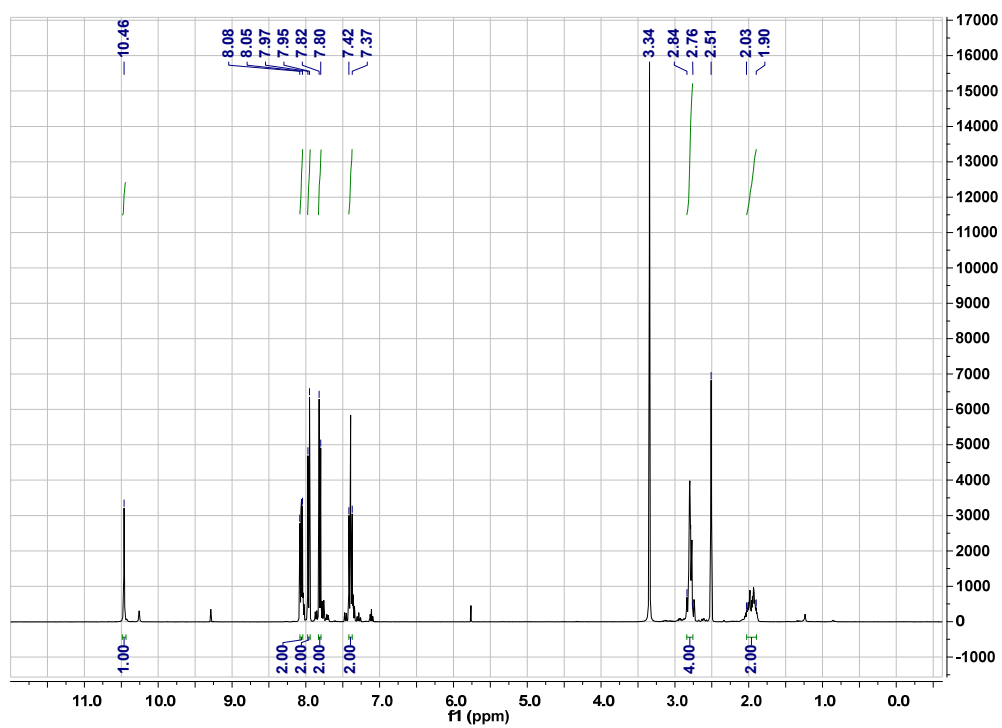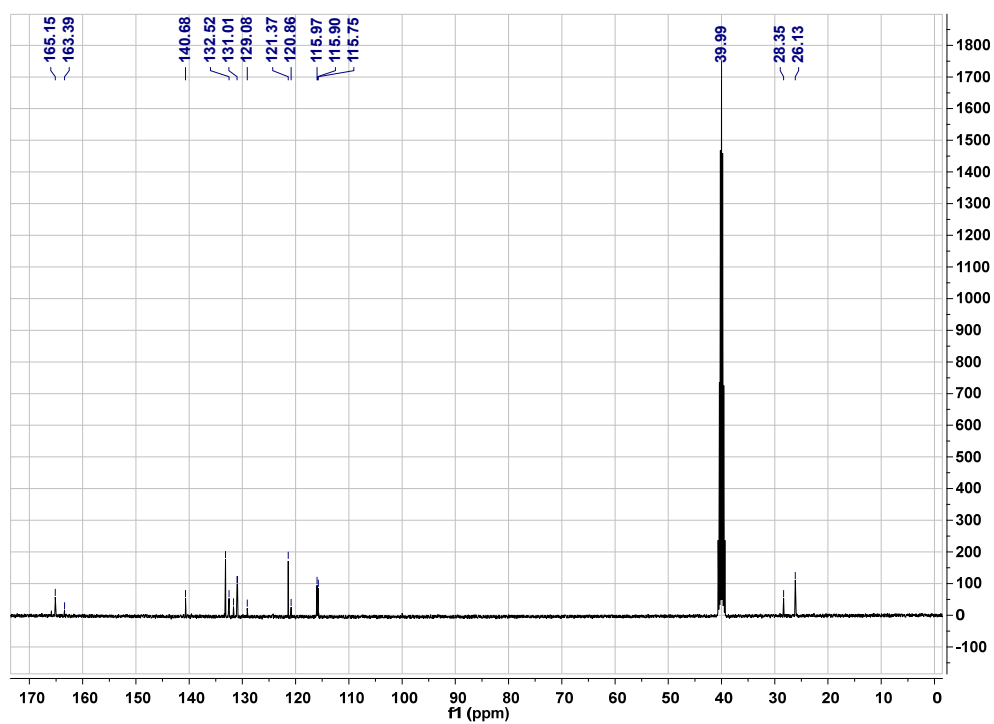

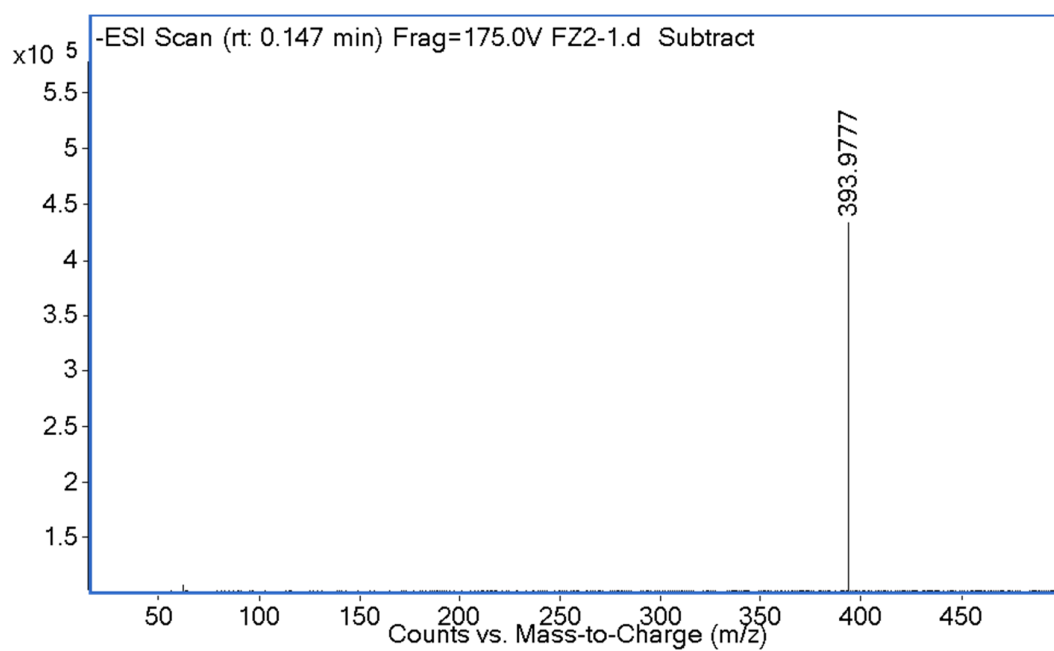

FZ5

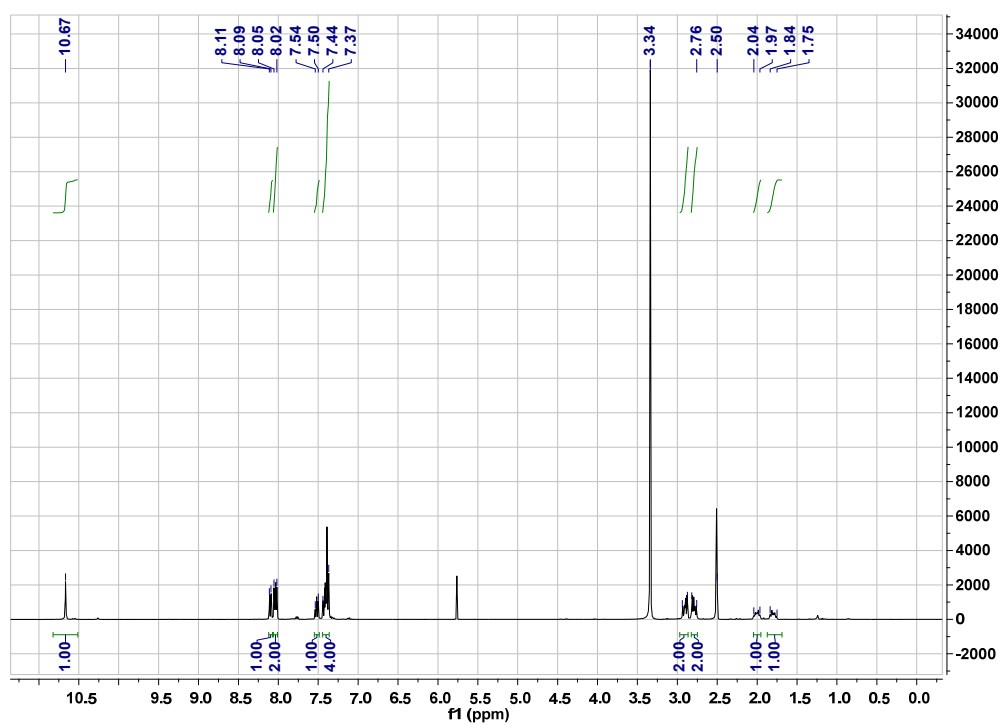

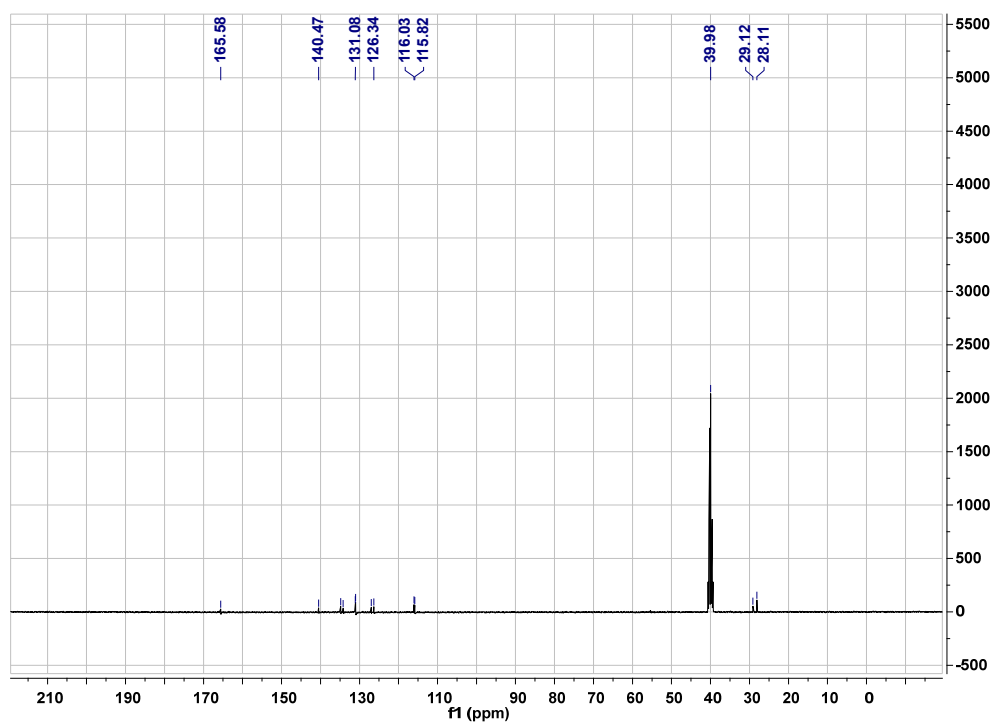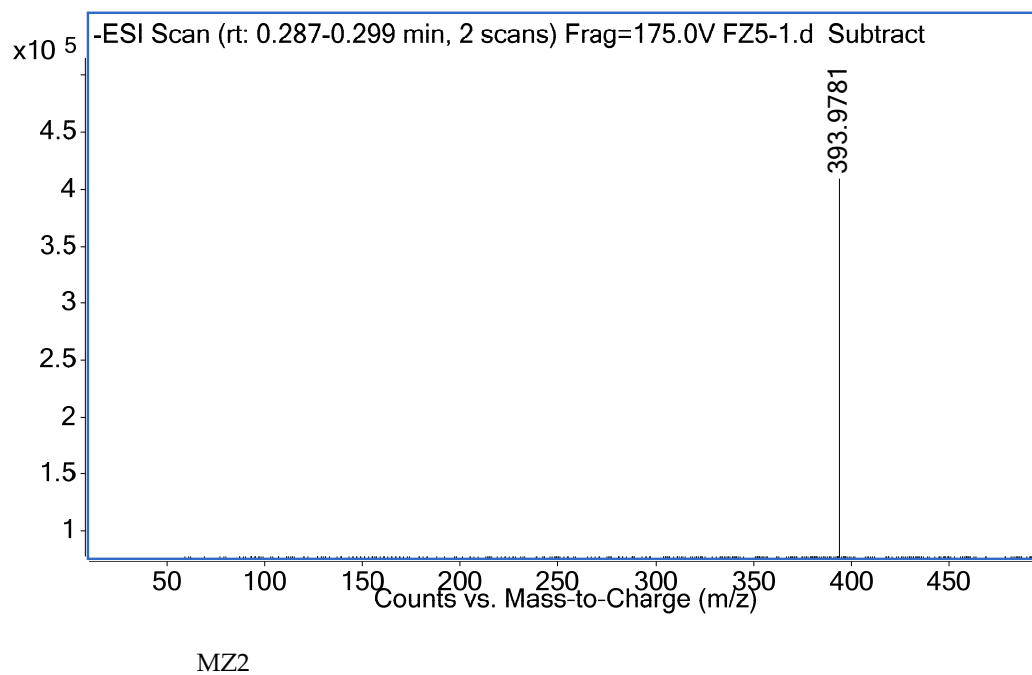

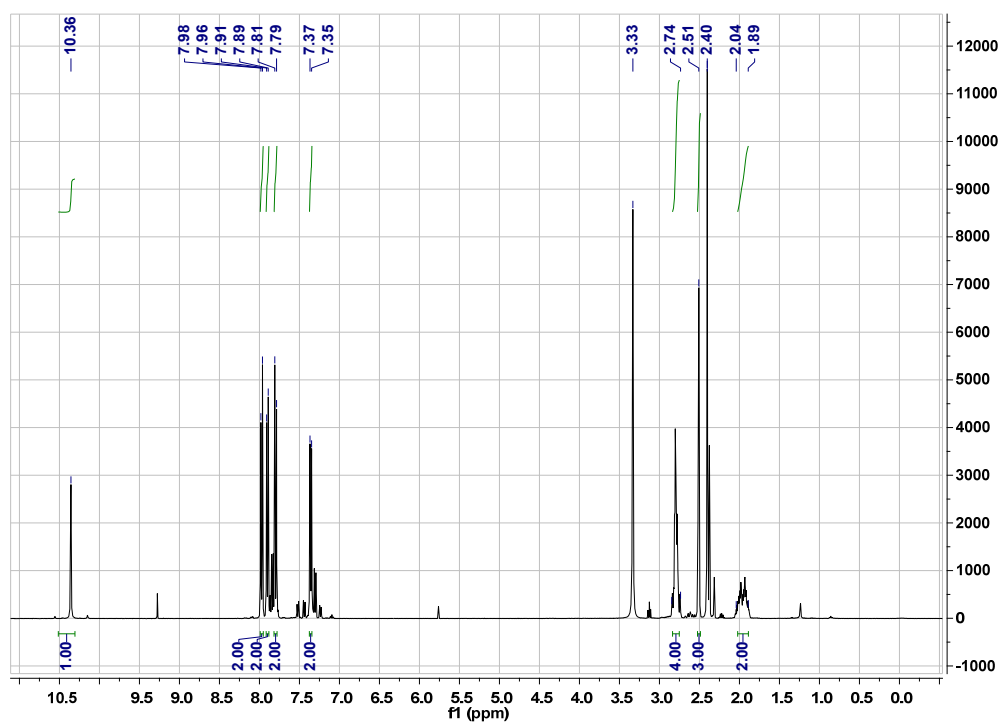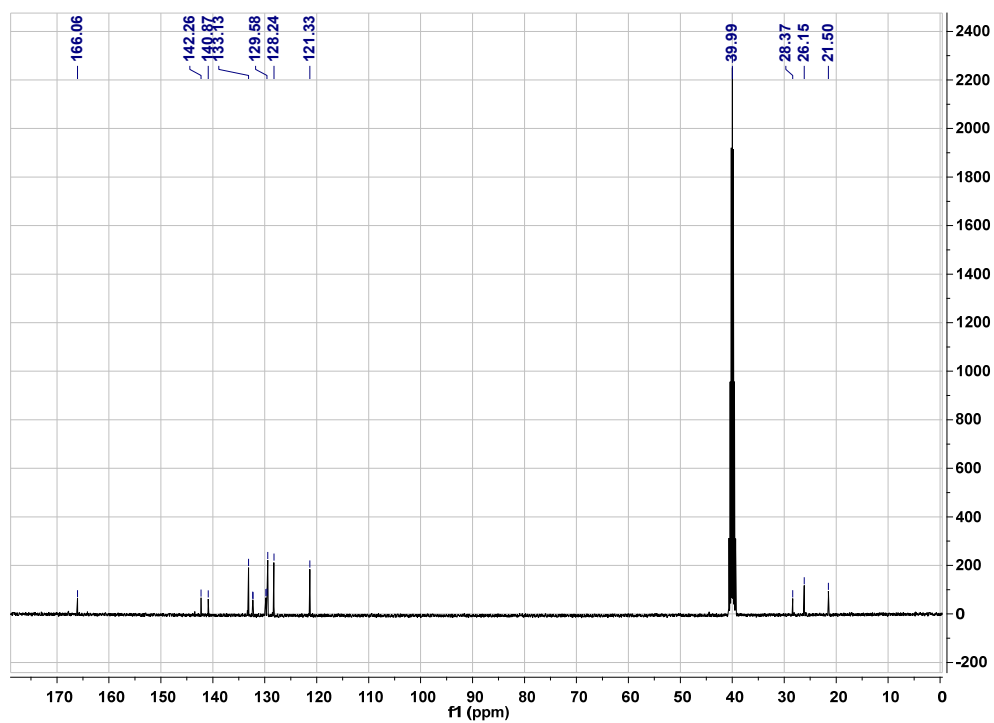

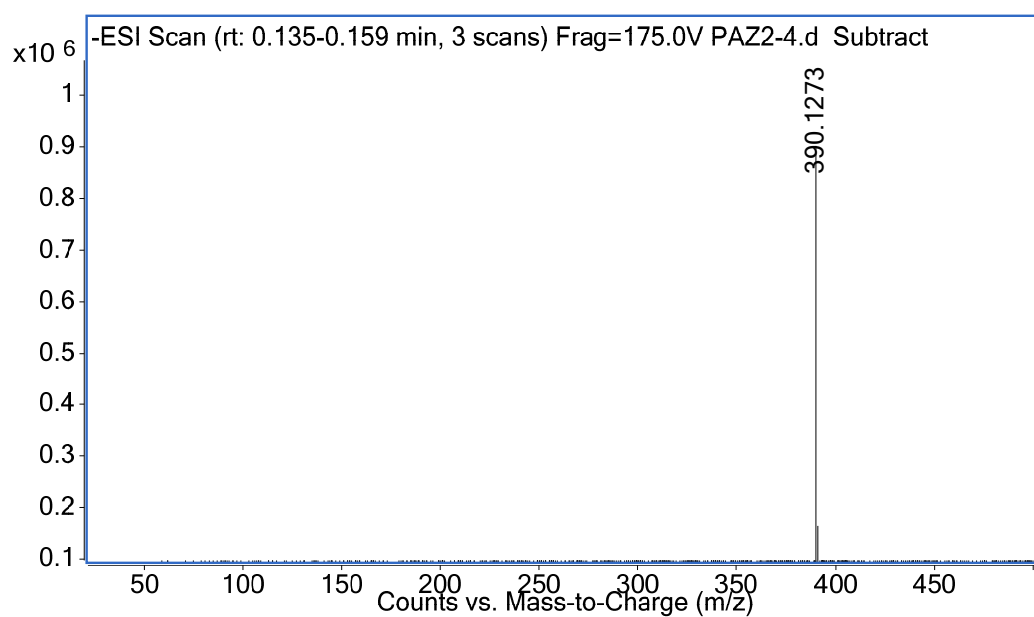

EZ2-003191

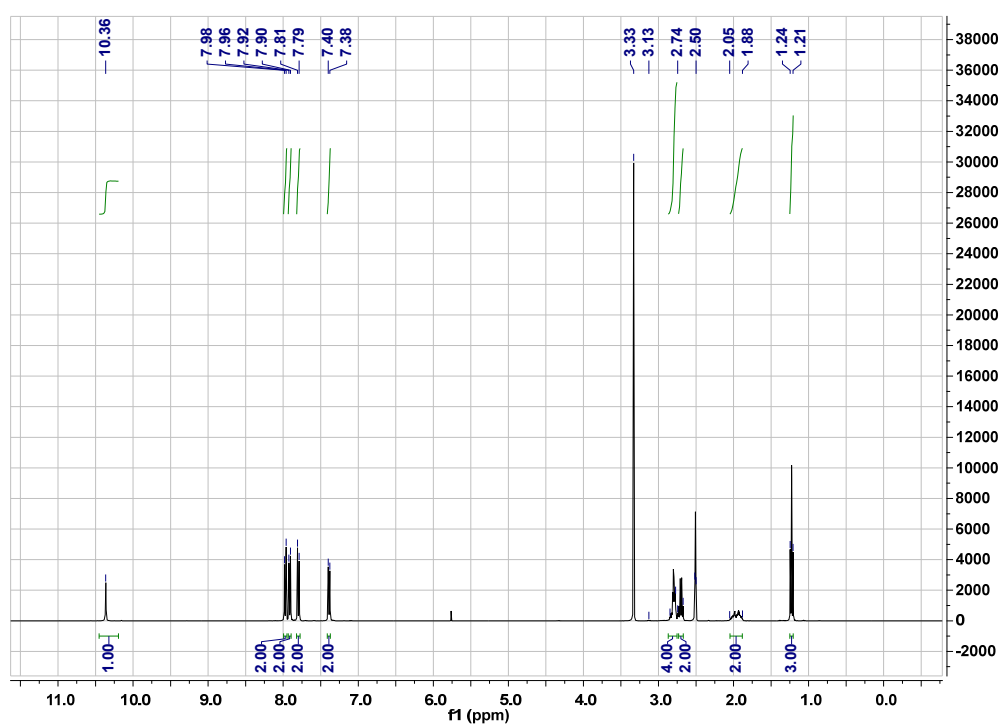

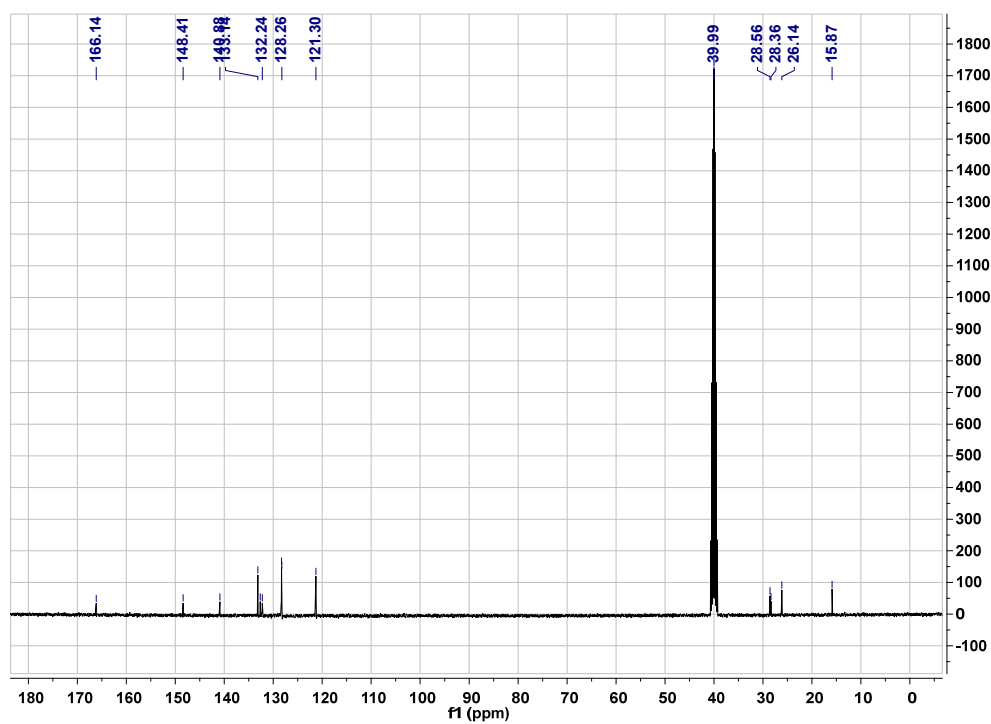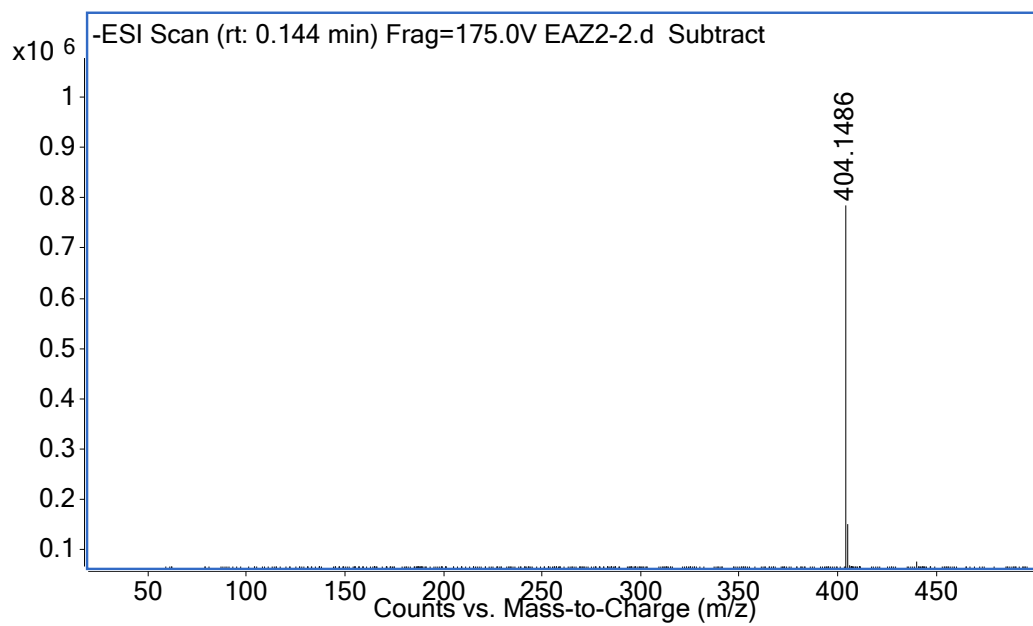

AZ2



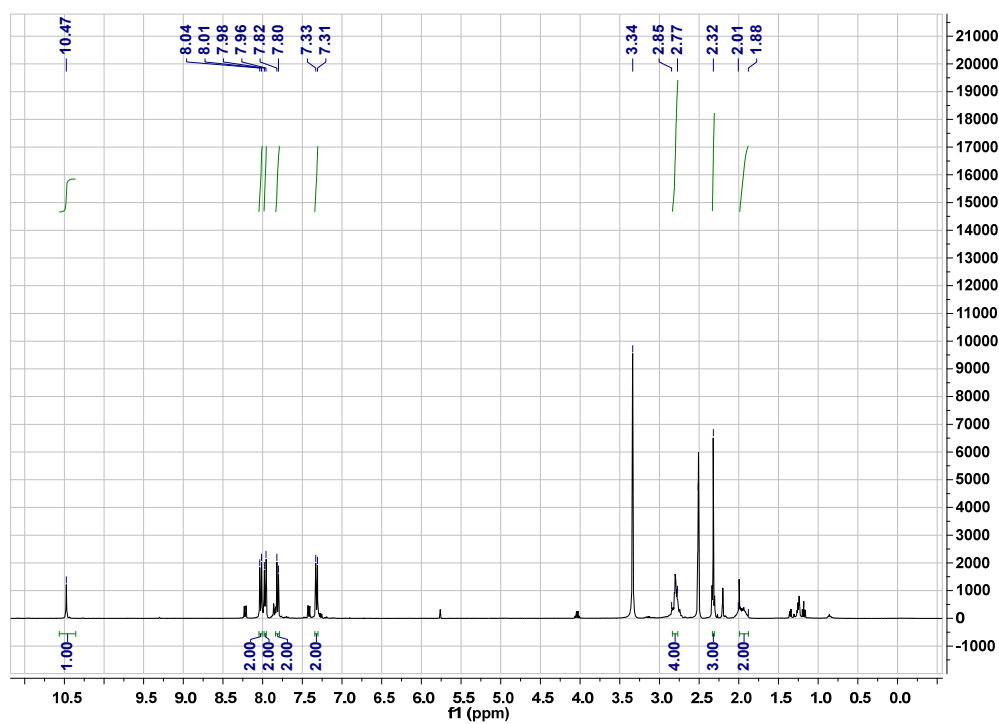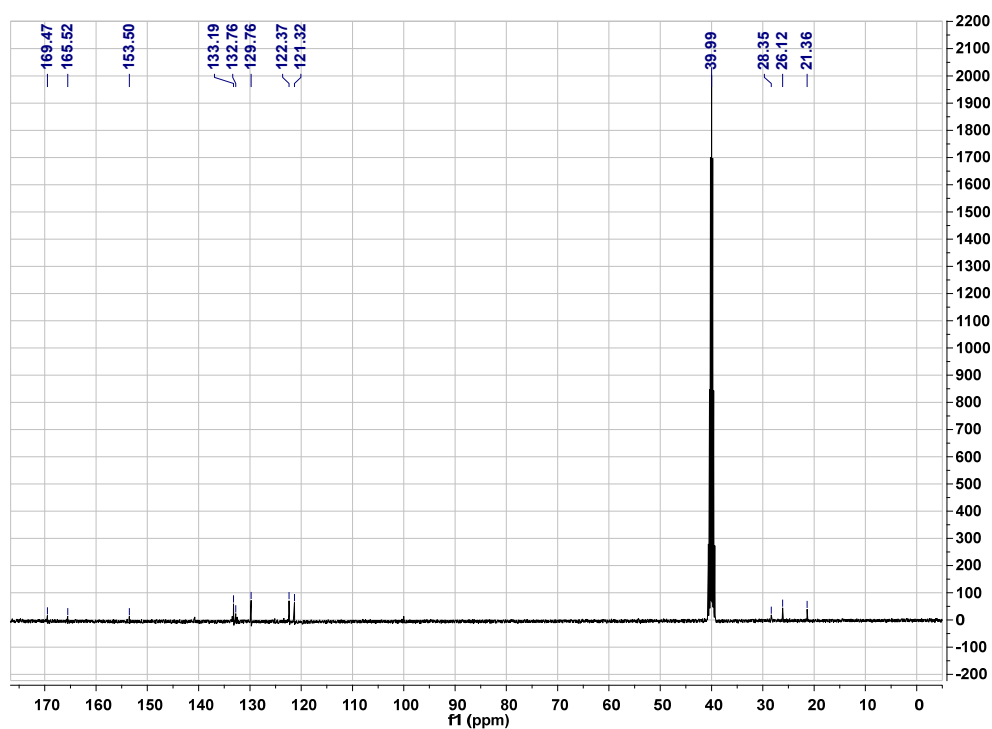

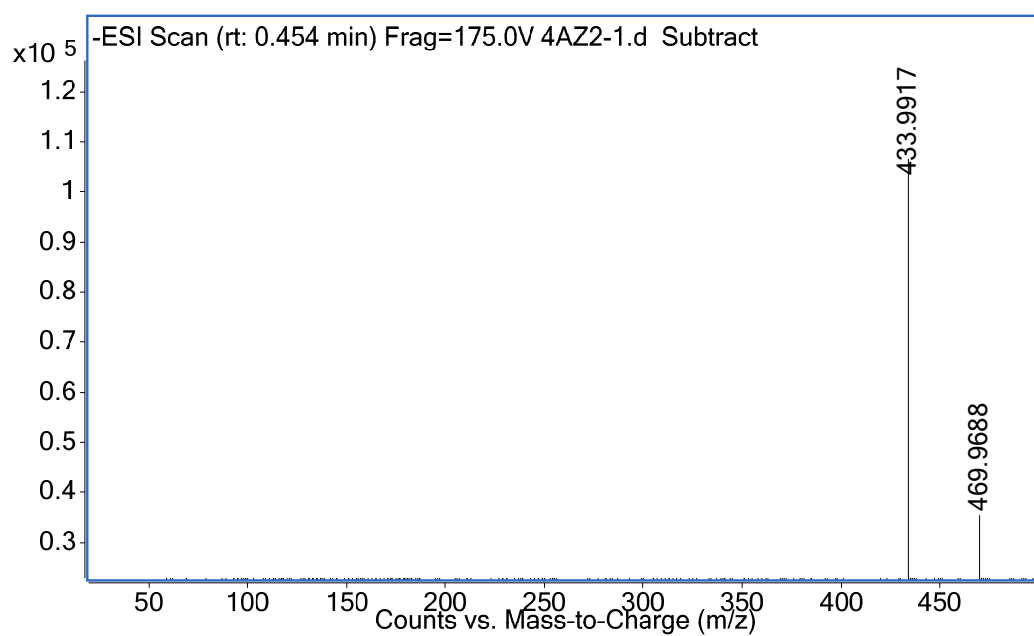

**Figure S1.**  $^1\text{H}$  and  $^{13}\text{C}$  NMR and Mass spectra of all the synthesized compounds.

## MTT assay of arsenicals to 6 cell lines

Table S1. Inhibition effect of organic arsenicals 24 h incubation.

| <i>IC</i> <sub>50</sub> /μM | Molm      | NB4       | 4T1       | Hela      | COS-7     | PBMC    |
|-----------------------------|-----------|-----------|-----------|-----------|-----------|---------|
| Z2                          | 0.60±0.01 | 1.50±0.05 | 1.67±0.14 | 1.01±0.01 | 6.1±0.2   | 4.6±0.3 |
| Z5                          | 0.45±0.01 | 0.40±0.03 | 0.87±0.09 | 0.30±0.13 | 1.75±0.08 | 3.5±0.3 |
| PZ2                         | 1.06±0.03 | 0.85±0.10 | 2.55±0.22 | 0.70±0.05 | 4.1±0.1   | 6.4±0.2 |
| PZ5                         | 0.27±0.09 | 0.3±0.03  | 0.40±0.04 | 0.26±0.03 | 1.01±0.02 | 5.0±0.1 |
| PFZ2                        | 0.80±0.02 | 0.50±0.02 | 1.00±0.11 | 0.50±0.12 | 6.0±0.1   | 6.3±0.1 |
| HDZ2                        | 0.60±0.12 | 0.80±0.11 | 1.00±0.11 | 2.0±0.2   | 9.1±0.2   | 5.8±0.2 |
| TAZ2                        | 1.60±0.12 | 1.00±0.11 | 3.5±0.1   | 2.0±0.2   | 9.1±0.15  | 7.3±0.3 |
| TAZ5                        | 0.71±0.02 | 0.20±0.03 | 0.70±0.03 | 0.80±0.04 | 2.0±0.1   | 2.2±0.1 |
| DAZ2                        | 0.90±0.09 | 1.71±0.12 | 1.50±0.12 | 2.3±0.1   | 7.1±0.1   | 6.2±0.3 |
| DAZ5                        | 0.45±0.06 | 0.80±0.01 | 0.60±0.10 | 0.81±0.03 | 1.61±0.09 | 4.1±0.3 |
| MAZ2                        | 0.20±0.09 | 0.40±0.12 | 0.80±0.12 | 0.40±0.06 | 5.2±0.1   | 7.6±0.2 |
| FZ2                         | 1.20±0.11 | 0.40±0.02 | 2.3±0.2   | 1.20±0.10 | 3.5±0.1   | 5.5±0.2 |
| FZ5                         | 0.50±0.01 | 0.15±0.1  | 0.70±0.02 | 0.35±0.10 | 1.10±0.21 | 2.4±0.2 |
| MZ2                         | 0.20±0.09 | 0.40±0.12 | 0.80±0.12 | 0.40±0.06 | 5.2±0.1   | 3.4±0.2 |
| EZ2                         | 1.10±0.10 | 0.41±0.05 | 1.40±0.12 | 1.01±0.12 | 4.2±0.1   | 3.7±0.2 |
| AZ2                         | 1.11±0.10 | 0.60±0.05 | 2.0±0.1   | 0.80±0.12 | 2.2±0.1   | 5.2±0.3 |

Table S2. Inhibition effect of organic arsenicals 48 h incubation.

| <i>IC</i> <sub>50</sub> /μM | Molm      | NB4       | 4T1       | Hela      | COS-7     | PBMC      |
|-----------------------------|-----------|-----------|-----------|-----------|-----------|-----------|
| Z2                          | 0.53±0.02 | 1.20±0.10 | 1.89±0.22 | 0.70±0.03 | 3.2±0.1   | 4.0±0.2   |
| Z5                          | 0.41±0.02 | 0.30±0.01 | 0.84±0.12 | 0.25±0.20 | 0.81±0.05 | 2.8±0.2   |
| PZ2                         | 0.75±0.03 | 0.70±0.06 | 3.35±0.42 | 0.44±0.05 | 1.75±0.11 | 5.3±0.3   |
| PZ5                         | 0.24±0.08 | 0.2±0.02  | 0.83±0.06 | 0.14±0.01 | 0.82±0.04 | 4.5±0.2   |
| PFZ2                        | 0.70±0.03 | 0.30±0.01 | 0.80±0.11 | 0.15±0.03 | 3.5±0.1   | 5.7±0.2   |
| HDZ2                        | 0.60±0.12 | 0.50±0.05 | 1.01±0.12 | 1.01±0.11 | 3.5±0.1   | 4.9±0.1   |
| TAZ2                        | 1.50±0.12 | 0.60±0.05 | 2.2±0.1   | 1.04±0.11 | 5.2±0.11  | 6.5±0.2   |
| TAZ5                        | 0.70±0.04 | 0.15±0.01 | 0.70±0.03 | 0.50±0.10 | 1.80±0.12 | 1.54±0.32 |
| DAZ2                        | 0.75±0.11 | 1.14±0.09 | 1.20±0.11 | 1.06±0.05 | 3.3±0.2   | 5.7±0.1   |
| DAZ5                        | 0.32±0.03 | 0.51±0.08 | 0.50±0.11 | 0.55±0.13 | 1.27±0.15 | 3.5±0.2   |
| MAZ2                        | 0.10±0.11 | 0.30±0.09 | 0.40±0.11 | 0.30±0.05 | 3.3±0.2   | 6.9±0.1   |
| FZ2                         | 1.00±0.11 | 0.30±0.1  | 2.2±0.1   | 0.40±0.05 | 2.2±0.1   | 4.7±0.2   |
| FZ5                         | 0.50±0.02 | 0.15±0.02 | 0.60±0.01 | 0.15±0.05 | 0.80±0.05 | 1.82±0.12 |
| MZ2                         | 0.10±0.11 | 0.30±0.09 | 0.40±0.11 | 0.30±0.05 | 3.3±0.2   | 2.7±0.3   |
| EZ2                         | 1.02±0.02 | 0.30±0.03 | 1.40±0.12 | 0.81±0.11 | 2.1±0.1   | 2.9±0.3   |
| AZ2                         | 1.01±0.02 | 0.60±0.03 | 1.00±0.12 | 0.50±0.11 | 2.1±0.1   | 4.9±0.3   |

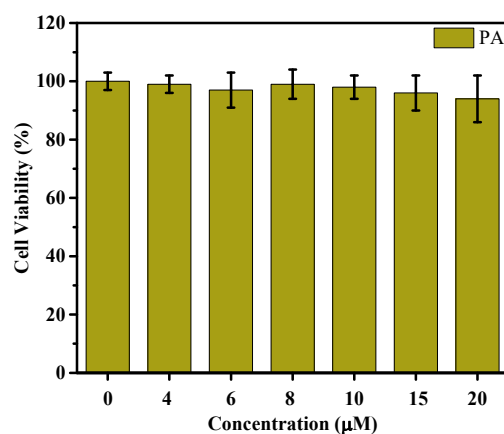

**Figure S2.** MTT assay of piperonylic acid (PA), precursor of PZ2.

### MAZ2 inhibited TrxR activity by binding to the C-terminal Sec/Cys pair

**Table S3.** The distance of arsenic and active sites of TrxR or Trx, and the binding energy.

|                              |      |        | Z2    | MAZ2  |
|------------------------------|------|--------|-------|-------|
| distance (Å)                 | TrxR | Cys497 | 10.6  | 7.4   |
|                              |      | Sec498 | 6.0   | 4.7   |
|                              | Trx  | Cys32  | 9.3   | 10.1  |
|                              |      | Cys35  | 7.6   | 8.6   |
| binding energy<br>(kcal/mol) | TrxR |        | -3.90 | -5.20 |
|                              | Trx  |        | -3.83 | -4.12 |

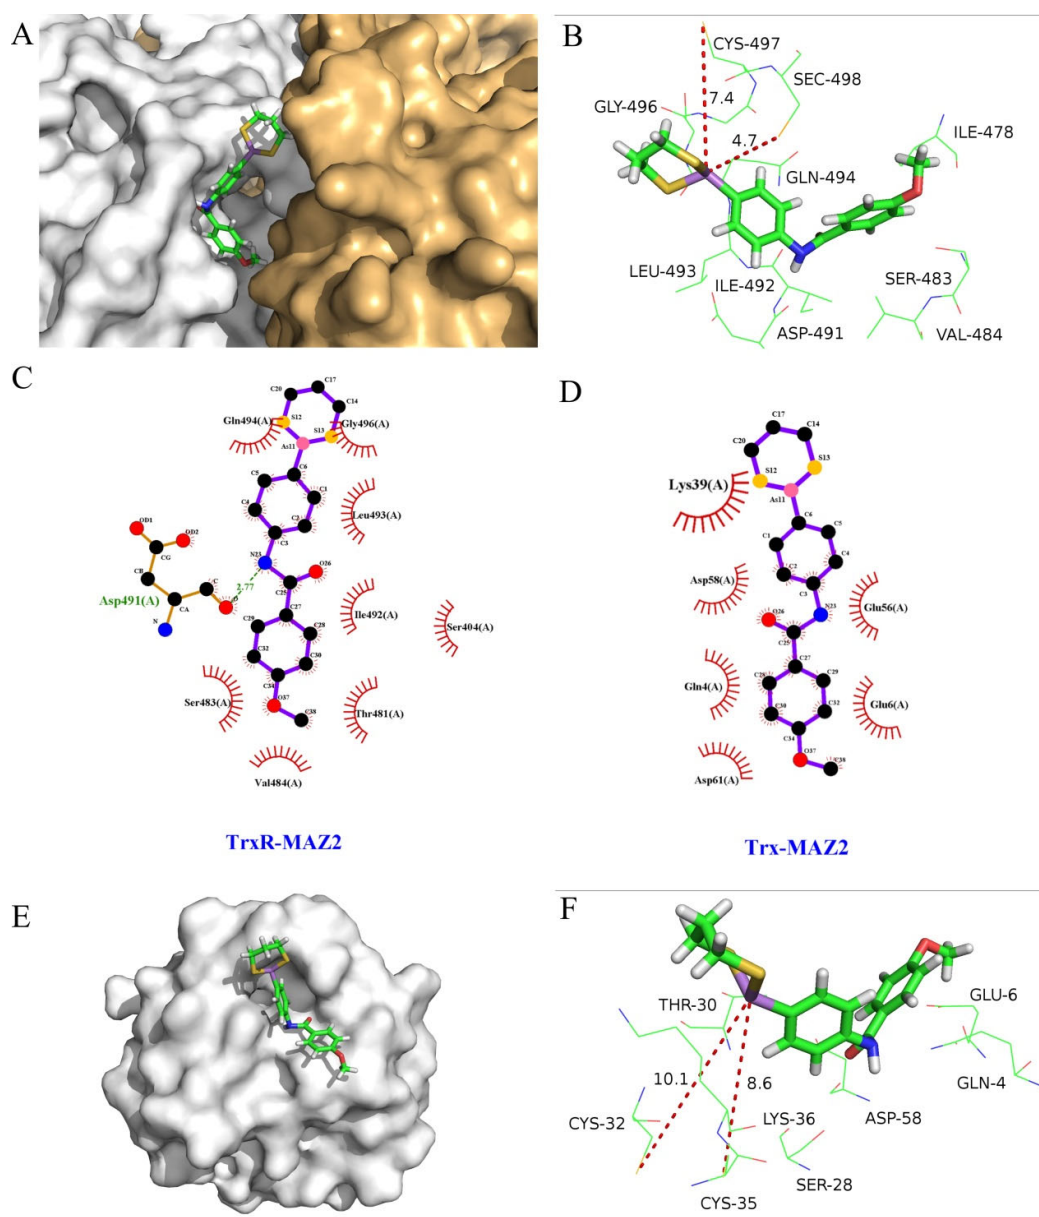

**Figure S3.** Binding site of MAZ2 in TrxR1 (PDB: 3EAN) and Trx1(PDB: 1ERT).

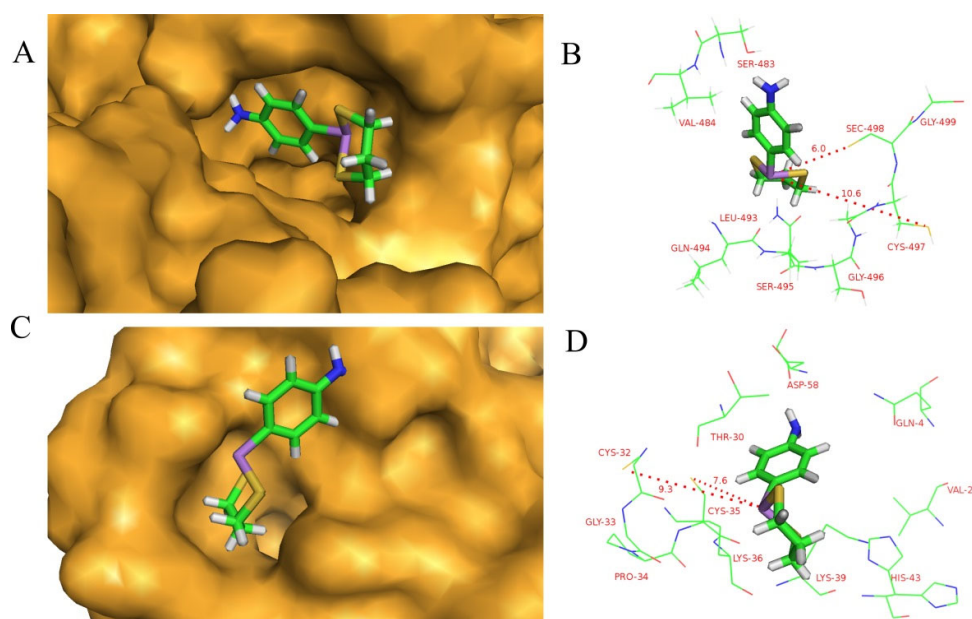

**Figure S4.** Binding site of Z2 in TrxR1 (PDB: 3EAN) and Trx1(PDB: 1ERT).

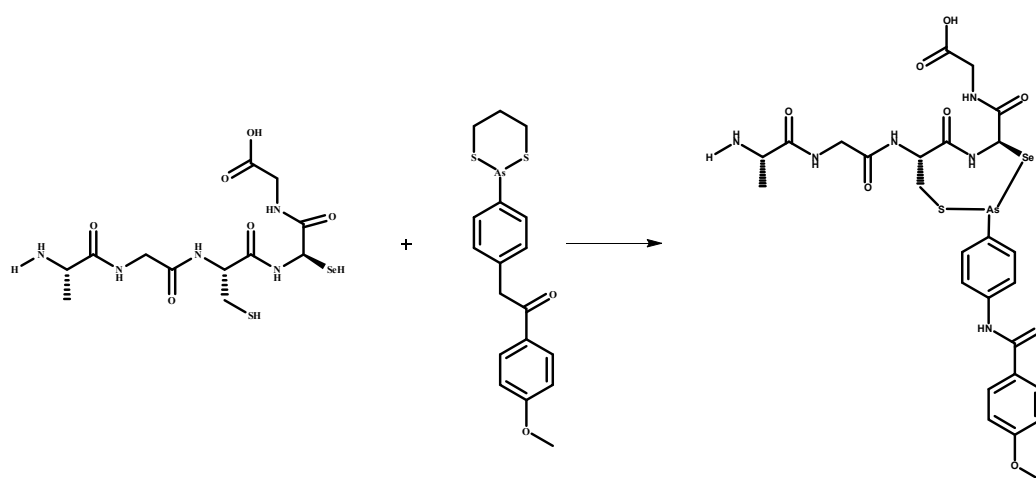

**Figure S5.** Reaction of AGCUG and MAZ2.

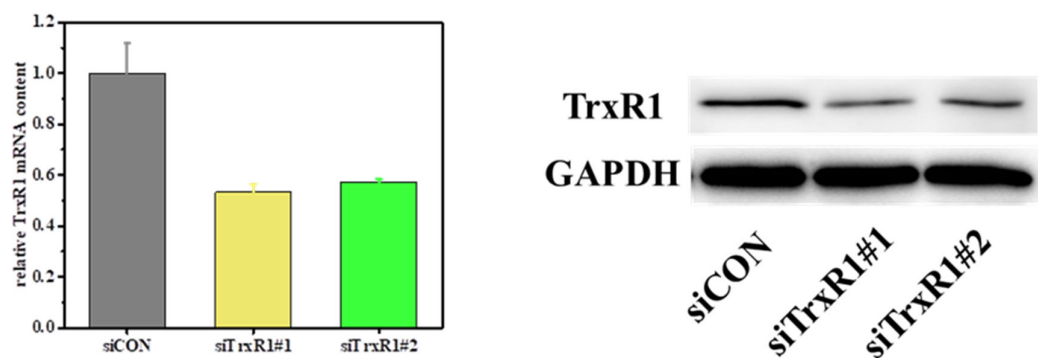

**Figure S6.** TrxR was knocked down by two siRNA, proved by PCR and WB.

### MAZ2 administration had no obvious side effects

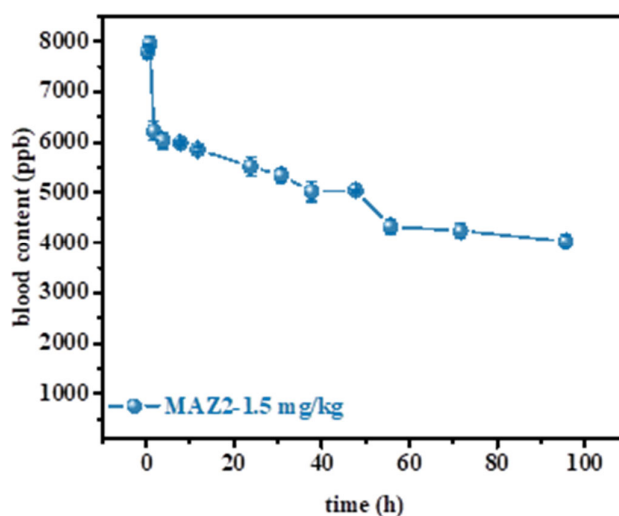

Figure S7. Arsenic content of rat blood administrated with 1.5 mg/kg MAZ2.

### siRNA

Table S4. sequence of siRNA.

|          | sense (5'-3')         | antisense (5'-3')     |
|----------|-----------------------|-----------------------|
| TrxR1-#1 | CAACCUUAAAGACGAUGAATT | UUCAUCGUCUUUAAGGUUGTT |
| TrxR1-#2 | GGAAGAGAUUCUUGUACGATT | UCGUACAAGAAUCUCUUCCTT |

### PCR

Table S5. sequence of primer.

| Gene           | sequences                            |
|----------------|--------------------------------------|
| <i>TrxR1</i>   | Forward 5'-TCCACAAACAGCGAGGAGAC -3'  |
|                | Reverse 5'-TGTCACCGATGGCGTAGATG -3'  |
| <i>TrxR2</i>   | Forward 5'-AATCTGGAGAAGGCTGGCATC-3'  |
|                | Reverse 5'-TTCCTGCCTTGATAGCTGTGG -3' |
| <i>Trx1</i>    | Forward 5'-ACTTCTCTGCTACGTGGTGTG -3' |
|                | Reverse 5'-CGGCATGCATTTGACTTCACA -3' |
| <i>Trx2</i>    | Forward 5'-TAACAGTAATGCCCAGCCCAG -3' |
|                | Reverse 5'-ACCACTGTGCATGAAAGTCCA -3' |
| <i>β-actin</i> | Forward 5'-GGACTCCTATGTGGGTGACG -3'  |
|                | Reverse 5'-CTTCTCCATGTCGTCCCAGT -3'  |
